Draft version 2021/12/23, submitted for peer review

# Pharmacological blockade of muscle afferents and perception of effort: a systematic review with meta-analysis

Maxime Bergevin<sup>1,2</sup>, James Steele<sup>3</sup>, Marie Payen de la Garanderie<sup>1,2</sup>, Camille Feral-Basin<sup>1,2</sup>, Samuele M. Marcora<sup>4</sup>, Pierre Rainville<sup>2,5</sup>, Jeffrey G. Caron<sup>1-6</sup> and Benjamin Pageaux<sup>1,2</sup>

<sup>1</sup> École de kinésiologie et des sciences de l'activité physique (EKSAP), Faculté de médecine, Montreal, Canada

<sup>2</sup> Centre de recherche de l'Institut universitaire de gériatrie de Montréal (CRIUGM), Montreal, Canada

<sup>3</sup> School of Sport, Health and Social Sciences, Southampton, United Kingdom

<sup>4</sup> Department of Biomedical and Neuromotor Sciences (DiBiNeM), University of Bologna, Bologna, Italy

<sup>5</sup> Département de stomatologie, Faculté de médecine dentaire, Université de Montréal, Montreal, Canada

<sup>6</sup> Centre de recherche interdisciplinaire en réadaptation du Montréal métropolitain, Montreal, Canada

## Corresponding author :

Benjamin Pageaux

École de kinésiologie et des sciences de l'activité physique (EKSAP)

Centre d'éducation physique et des sports (CEPSUM)

Faculté de médecine, Université de Montréal

2100, boul. Édouard-Montpetit

Montréal, QC H3T 1J4

Canada

+ 1 514-343-6111

[benjamin.pageaux@umontreal.ca](mailto:benjamin.pageaux@umontreal.ca)

29

30 **ORCID :**

31 Maxime Bergevin: [https://orcid.org/ 0000-0002-0343-8900](https://orcid.org/0000-0002-0343-8900)

32 James Steele : <https://orcid.org/0000-0002-8003-0757>

33 Camille Féral-Basin : [https://orcid.org/ 0000-0003-0045-8268](https://orcid.org/0000-0003-0045-8268)

34 Samuele M. Marcora : <https://orcid.org/0000-0002-1570-7936>

35 Pierre Rainville: <https://orcid.org/0000-0001-9801-757X>

36 Benjamin Pageaux : <https://orcid.org/0000-0001-9302-5183>

37 **Statement and Declarations**

38 **Funding statement.** MB is supported by the Canadian Institutes of Health Research through the Canada  
39 Graduate Scholarships – Master’s Frederick Banting and Charles Best grant, the “Formation de maîtrise”  
40 scholarship from the Fond de recherche en santé du Québec and an MSc scholarship from the Centre de  
41 recherche de l’Institut universitaire de gériatrie de Montréal (CRIUGM). BP’s research is supported by  
42 the Natural Sciences and Engineering Research Council of Canada—Discovery Grants Program.

43 **Competing interests.** The authors have no conflict of interest to disclose in respect to this manuscript.

44 **Availability of data and material.** All data and materials are available within the manuscript or in  
45 supplemental materials.

46 **Code availability.** Not applicable

47

48

49 **Keywords**

50 Perceived exertion, sense of effort, motor drive, motor command, neural feedback, central command,  
51 peripheral feedback, opioid, spinal anesthesia, epidural anesthesia, impaired afference, exercise,  
52 endurance

53

## 54 **Abstract**

55 The perception of effort (PE) provides information on task difficulty and influences physical  
56 exercise regulation and human behavior. This perception differs from other-exercise related  
57 perceptions such as pain. There is no consensus on the role of group III-IV muscle afferents  
58 as a signal processed by the brain to generate PE. The aim of this meta-analysis was to  
59 investigate the effect of pharmacologically blocking muscle afferents on the PE. Six databases  
60 were searched to identify studies measuring the ratings of perceived effort (RPE) during  
61 physical exercise, with and without pharmacological blockade of muscle afferents. Articles  
62 were coded based on the operational measurement used to distinguish studies in which PE  
63 was assessed specifically (*effort dissociated*) or as a composite experience including other  
64 exercise-related perceptions (*effort not dissociated*). Articles that did not provide enough  
65 information for coding were assigned to the *unclear* group. The *effort dissociated* group ( $n=6$ )  
66 demonstrated a slight RPE increase with reduced muscle afferents feedback (standard mean  
67 change raw (SMCR), 0.39; 95% CI, 0.13 to 0.64). The group *effort not dissociated* ( $n=2$ ) did  
68 not reveal conclusive results (SMCR, -0.29; 95% CI, -2.39 to 1.8). The group *unclear* ( $n=8$ )  
69 revealed a slight RPE decrease with reduced muscle afferents feedback (SMCR, -0.27;  
70 95% CI, -0.50 to -0.04). The heterogeneity in results between groups reveals that the inclusion  
71 of other perceptions than effort in its rating influences the RPE scores reported by the  
72 participants. The absence of decreased RPE in the *effort dissociated* group suggests that  
73 muscle afferents feedback is not a sensory signal generating PE.

74 **250 words**

75

76 **Key points** (2-3 sentences summarizing, in non-technical language, the key findings/implications of the manuscript)

77 To date, there is no consensus on the neurophysiological signal processed by the brain to generate  
78 the perception of effort. Following a systematic search in six databases, this meta-analysis reveals  
79 that reducing afferent feedback from the working muscles via epidural anesthesia does not reduce  
80 perception of effort. This systematic review emphasizes the role of the corollary discharge  
81 associated with the motor command as the signal processed by the brain to generate the perception  
82 of effort.

83

## 84 **1. Introduction**

85 During physical exercise, the perception of effort provides information on the intensity and difficulty  
86 of the task being performed. The perception of effort is involved in the regulation of human behavior and  
87 influences how the nervous system selects a given movement amongst a myriad of possibilities [1, 2]. The  
88 perception of effort is exacerbated in the presence of fatigue [3] and various pathologies such as chronic  
89 fatigue syndrome [4, 5], stroke [6] and cancer [7]. This perception is used to prescribe and monitor  
90 exercise in both rehabilitation programs [8, 9] and athletic training [10-12]. Despite the growing interest  
91 in this perception, to date, researchers have failed to reach a consensus on the signal(s) processed by the  
92 brain leading to its generation [13-15].

93 One popular model amongst exercise physiologists, referred to as the afferent feedback model, suggests  
94 that the feedback originating from the peripheral organs active during physical exercise (i.e., skeletal  
95 muscles, heart, lungs) is processed by the central nervous system to generate the perception of effort [16,  
96 17]. Notably, authors suggested that feedback from group III-IV muscle afferents plays an important role  
97 in the generation of the perception of effort [16, 18]. The ratings of perception of effort intensity would  
98 then be predicted to increase with higher discharge rates of the muscle afferents accompanying intense  
99 exercise [19, 20]. In contrast, a popular model amongst neuroscientists, cardiovascular physiologists and  
100 physiologists interested in kinesthesia is the corollary discharge model. This model proposes that the  
101 perception of effort is generated by the processing of a copy of the central motor command, named the  
102 corollary discharge [21-24]. In this model, an increase in the magnitude of the central motor command  
103 should result in an increase in the perception of effort intensity [21, 25]. It is important to note that this  
104 model does not bar peripheral contributions to the regulation of central commands during voluntary  
105 movement, but states that central processing of afferent feedback does not generate the perception of effort  
106 and that effort could be perceived in the absence of afferent feedback [13, 14, 26, 27]. For example, any  
107 peripheral or central mechanism able to alter the muscle force production capacity [21, 28] or the  
108 corticospinal excitability – the ease with which the central motor command is relayed to the motoneurons  
109 [29] – may modulate the perception of effort by increasing or decreasing the magnitude of the central  
110 motor command needed to sustain a given level of performance [30].

111 A powerful technique to gain insights into the neurophysiology of the perception of effort and test the  
112 existing models is by pharmacologically blocking muscle afferents while monitoring the perception of  
113 effort [e.g., 26, 31, 32, 33]. Since the afferent feedback model considers group III-IV muscle afferents as  
114 the signal processed by the brain to generate the perception of effort, pharmacologically blocking muscle  
115 afferents should decrease the ratings of perceived effort. On the other hand, observing stable or increased

116 ratings of perceived effort in the presence of reduced muscle afferents feedback would support a centrally  
117 generated perception of effort. Intrathecal and epidural injection of anesthetics or analgesics, such as  
118 lidocaine or fentanyl, has traditionally been used to investigate the role of group III-IV muscle afferents  
119 and the motor command in cardio-respiratory responses to exercises in both healthy [e.g., 32] and  
120 symptomatic participants [e.g., 34] as well as in human performance during endurance exercises [35]. In  
121 these studies, participants performed an exercise protocol, usually cycling or isolated knee exercises, with  
122 and without intact feedback from group III-IV muscle afferents. While the primary variables of interest  
123 were the cardio-respiratory responses to the tasks, these studies often measured the perception of effort as  
124 a secondary or tertiary variable. Interestingly, there are conflicting results from these studies. In the  
125 presence of pharmacological blockade of muscle afferents, several authors observed a decrease [e.g., 36]  
126 in the ratings of perceived effort while others observed no difference [e.g., 33] or an increase [e.g., 37]  
127 when compared to a sham or control intervention. This heterogeneity is also found in patients with  
128 cardiovascular diseases [e.g., 34, 38]. To the best of our knowledge, only one published article has  
129 narratively reviewed the use of pharmacological blockade to explore the neurophysiological mechanisms  
130 underlying the perception of effort [26], and a systematic approach has yet to be conducted.

131 The conflicting findings on the effects of pharmacologically blocking muscle afferents on the perception  
132 of effort may be explained by differences in its operational definitions, leading to inconsistencies in the  
133 instructions provided to the participants on how to quantify the perception of effort. In his seminal work,  
134 Borg defined the perception of effort as how *heavy* and *laborious* a physical task is [39, 40]. However, he  
135 also mentioned that this perception results from the integration of various peripheral factors, including the  
136 organs of circulation and respiration, the muscles, the skin, and the joints. Since this first definition and  
137 associated description provided by Borg, two lines of research have investigated the perception of effort  
138 in exercise sciences (see figure 1). A first line of research considers effort as a construct encompassing a  
139 mix of exercise-related perceptions [17, 41]. This approach results from the original description proposed  
140 by Borg, and later authors supplemented this definition with the notions of fatigue and discomfort: *the*  
141 *subjective intensity of effort, strain, discomfort, and/or fatigue that is experienced during physical exercise*  
142 [17]. However, experimental data demonstrated that the perception of effort can be dissociated from other  
143 exercise-related perceptions, such as pain [42, 43], discomfort [44-46], muscle tension [47, 48] and fatigue  
144 [49, 50]. In line with the aforementioned evidence, a second line of research considers effort as a construct  
145 dissociated from other perceptions. This approach follows Borg's original definition conceptualizing the  
146 perception of effort as one's appreciation of the difficulty of a task (how *hard* it is). For instance, Preston  
147 and Wegner [51] described the perception of effort as the *feeling of difficulty and labor experienced during*  
148 *exertion*. In 2010, Marcora proposed that the perception of effort is the *conscious sensation of how hard,*

149 *heavy and strenuous a physical task is* [52]. More recently, Steele defined the perception of effort as the  
150 *perception of current task demands relative to the perception of capacity to meet those demands* [15]. In  
151 light of the disparate definitions proposed in the literature, it appears crucial to consider the definition used  
152 to investigate the perception of effort when interpreting such data. However, to the best of our knowledge,  
153 such consideration has not been made in the literature when discussing the signal(s) generating perception  
154 of effort.

155 In this context, the aim of this systematic review with meta-analysis was to explore the impact of  
156 pharmacologically blocking muscle afferents on the perception of effort during physical tasks. To explore  
157 whether the inclusion or not of other exercise-related perceptions influence the quantification of perceived  
158 effort, a qualitative approach was used to group included studies by their definition prior to the statistical  
159 analyses.

160 **\*\*Please insert figure 1\*\***

161

## 162 2. Methods

163 The present review was conducted and is reported as per the Preferred Reporting Items for Systematic  
164 Reviews and Meta-analyses statement (PRISMA; [53]). All methods were pre-specified in a protocol  
165 registered on PROSPERO (CRD401913921) prior to the screening process and any deviations from the  
166 pre-registered methods are noted throughout.

### 167 2.1 Search

168 The following electronic databases were searched to identify studies: MEDLINE, EMBASE, CINAHL,  
169 SPORTDiscuss, Web of Science and PsycINFO. To ensure the inclusion of recently published articles,  
170 the search was conducted on three separate occasions (April 2019 and March 2020 and October 2021). A  
171 search strategy was developed for MEDLINE and adapted for each database. The first of the two concepts  
172 included was the perception of effort and included the following terms: *perception of effort, sense of effort,*  
173 *perceived exertion, central motor command, central motor drive*. Because the perception of effort has  
174 been used by some in the neuroscience literature as an index of the central motor command during  
175 exercise, the latter has been included in this concept. The second concept related to the pharmacological  
176 blockade and included the following terms: *epidural anesthesia, spinal anesthesia, neural blockade, nerve*  
177 *block, sensory dysesthesia, fentanyl, lidocaine, bupivacaine, muscle afferent, neural feedback, afferent*  
178 *feedback, and group III-IV*. It is noteworthy that, despite using the same search strategy in all three  
179 instances, PsycINFO returned fewer articles each time the database was scanned (65 against 30 against 27  
180 articles) and that 47 of the 65 original articles were not found in the subsequent searches. Additionally, no  
181 limitation to the publication date was set during the search. The complete search strategy for every scanned  
182 database is available in the supplementary material S1.

### 183 2.2 Article inclusion

184 Eligibility criteria were defined accordingly with the PICOS model. Articles qualified for inclusion if  
185 they met the following criteria: 1) *population*: intervention was done on human participants, 2)  
186 *intervention*: consisted of a blockade of spinal afferents by epidurally or intrathecally injecting a local  
187 anesthetic or analgesics, 3) *comparators*: intervention was compared against a control or placebo  
188 condition, 4) *outcome*: the perception of effort was a primary, secondary, or tertiary outcome, and 5) *study*  
189 *design*: repeated-measure designs. Additionally, only articles published in peer-reviewed journals and  
190 written in English were retained. We also opted not to include self-paced protocols to allow comparison  
191 between studies. This decision is based on the necessity to compare the intensity of the perception of effort  
192 when the task demand (e.g., power output) is matched between conditions [15]. The study selection



193 process was done separately by MB and MPDLG, using the online platform Covidence  
194 (<https://www.covidence.org/home>). Conciliation of study selection was done after screening at the  
195 title/abstract level and after the full-text screening. Disagreements were settled through discussion and, if  
196 necessary, through consultation with BP and JS intervention.

197

### 198 **2.3 Risks of bias**

199 Risks of bias were appraised with a modified version [54] of the Effective Public Health Practice Project  
200 (EPHPP) Quality Assessment Tool for Quantitative Studies [55]. By not applying the selection bias  
201 component, this version was adapted to accommodate sport sciences studies where self-referral is common  
202 [54]. Further adaptations were made to reflect the need of the present review following the Cochrane  
203 Collaboration's guidelines [56]. The EPHPP does not provide explicit instructions on the assessment of  
204 cross-over trials, which was a type of design in the included studies. Appropriately randomized cross-over  
205 trials were considered equivalent to randomized controlled trials whereas cross-over trials performed in a  
206 counter-balanced order or with inappropriate randomization were considered equivalent to controlled  
207 clinical trials. Studies testing participants before and after opioid injection in a pre-post fashion were  
208 considered cohort studies. Risks of bias may be different across several outcomes and thus warranted  
209 confounders to be appraised specifically for the perception of effort. This is important because authors  
210 often consider the perception of effort when interpreting their results [e.g., 57] or use their results to draw  
211 conclusions on the regulation of the perception of effort [e.g., 58]. The risk of unblinding in the included  
212 studies is high, owing to the side effects the epidural anesthesia may have [e.g., pruritus, dysesthesia; 59].  
213 As such, studies were considered blinded only if they detailed adequate blinding methods, such as the use  
214 of a sham injection. Because correctly guessing the interventions may influence the outcomes [60], the  
215 reviewers noted whether the participants were asked to guess the order of the interventions when  
216 applicable. However, this had no impact on the labelling of the "blinding" component of the EPHPP. The  
217 *withdrawals and drop-outs* component was not applied because none was reported in the included studies.  
218 This is probably because the included studies were brief, usually spanning over 3 to 5 visits. Finally, all  
219 the included studies were either cross-over trial or cohort studies, in which the risk of carry-over is critical.  
220 This component was considered when making a judgment for the intervention integrity. As such, the  
221 reviewer noted whether the risks of carry-over were minimized by allowing sufficient time in-between  
222 experimental visits for the effects of both protocol and the anesthesia to dissipate (wash-out period).  
223 Alternatively, risks of carry-over were considered minimal if baseline values between conditions were  
224 similar.



225

## 226 **2.4 Coding process**

227 Included articles were classified into three distinct groups: 1) effort dissociated from other exercise-  
228 related perceptions (*effort dissociated* group), 2) effort including other exercise-related perceptions (*effort*  
229 *not-dissociated* group) and 3) not enough information (*unclear* group). A first round attempted to code  
230 articles by the reported definition of the perception of effort or the instructions provided to their  
231 participants. However, this method was insufficient as none of the studies explicitly reported either of  
232 those. Following this, a finer decision-making process was developed by JC, CFB, MB, MPDLG and BP  
233 (see figure 2a). During a second round, the reviewers noted whether other exercise-related perceptions(s)  
234 were measured (coded as *effort dissociated*) and whether the perception of effort was used interchangeably  
235 with other exercise-related perception(s) (coded as *effort not dissociated*). If this information was not  
236 available, studies using the perception of effort as an index of the central motor command were coded as  
237 *effort dissociated*. Studies that could not be coded on that basis were coded as *unclear*. Articles were  
238 separately coded by MB and MPDLG. Decisions were then conciliated, and disagreements settled through  
239 discussion with BP. Notably, this process was done separately to the data extraction for meta-analysis  
240 (described below). The analyst (JS) was not provided with the final coding until after extraction was  
241 complete.

242 **\*\*Please insert figure 2\*\***

243

## 244 **2.5 Data extraction**

245 Data extraction tables were prepared to map: (a) author and year of publication; (b) the test/exercise  
246 conditions used; (c) the method and scale used to capture ratings of perception of effort; (d) the means and  
247 standard errors or standard deviations for ratings of perception of effort including both control and  
248 intervention conditions; and (e) sample sizes. Of note, we included data for all perception of effort  
249 outcomes reported in studies and for all time points for which they were measured; thus, if a study reported  
250 multiple perception of effort measurements were captured, these were all included but appropriately coded  
251 as either being taken during submaximal tasks or maximal tasks (*i.e.*, at task failure). Some studies only  
252 reported data graphically or did not report outcomes in a manner conducive to extraction for our analysis,  
253 or despite investigating spinal blockade and capturing ratings of perception of effort did not report these  
254 outcomes as they were secondary in those studies. In these cases, authors were contacted for sharing either  
255 appropriate summary statistics or raw data to facilitate inclusion in our analysis. Three authors were

256 contacted of which one shared the required summary statistics whereas others were either unable or  
257 unwilling to share their data. For the studies reporting only graphical data, WebPlotDigitizer (v4.3, Ankit  
258 Rohatgi; <https://apps.automeris.io/wpd/>) was used to extract data for inclusion in our analysis.

259

## 260 **2.6 Synthesis and analysis**

261 The meta-analysis was performed using the ‘metafor’ [61] package in R (v 4.0.2; R Core  
262 Team, <https://www.r-project.org/>). All analysis codes are available on the Open Science Framework  
263 website (<https://osf.io/cy5n4/>). As all studies relied on within-participant design, the standardized mean  
264 change using the raw values (SMCR) as described by Becker [62] was calculated between the conditions  
265 where the pooled standard deviation from both conditions was used as the denominator for standardization  
266 [63]:

$$267 \text{ Equation 1 : } SMCR = c(n - 1) \frac{\mu_{con} - \mu_{int}}{SD_{con+int}}$$

268 Where  $\mu_{con}$  and  $\mu_{int}$  are the means for control and intervention conditions respectively,  $c$  is a bias  
269 correction factor [64], and  $SD_{(con+int)}$  is the pooled standard deviation calculated as:

$$270 \text{ Equation 2 : } SD_{con+int} = \sqrt{\frac{(n_{con}-1)SD_{con}^2 + (n_{int}-1)SD_{int}^2}{n_{con} + n_{int} - 2}}$$

271 As some studies reported zero variances (*e.g.*, some showing ceiling effects), a small constant (six sigma  
272 *i.e.*,  $3 \times 10^{-7}$ ) was added to all studies prior to calculating effect sizes. The magnitude of standardized effect  
273 sizes was interpreted with reference to Cohen [65] thresholds: *trivial* (<0.2), *small* (0.2 to <0.5), *moderate*  
274 (0.5 to <0.8), and *large* (>0.8). Standardized effects were calculated in such a manner that negative effect  
275 size values indicated the presence of an intervention effect (*i.e.*, a drop in rating of perception of effort),  
276 whereas a positive effect size values indicated an effect favoring the control conditions.

277 As a departure from the pre-registered analysis due to the nested structure of the effect sizes calculated  
278 from the studies included (*i.e.*, effects nested within groups nested within studies), multilevel mixed effects  
279 meta-analyses reflecting these nested random effects in the model were performed. Cluster robust point  
280 estimates and precision of those estimates using 95% compatibility (confidence) intervals (CIs) were  
281 produced, weighted by inverse sampling variance to account for the within- and between-study variance  
282 (tau-squared). Restricted maximal likelihood estimation was used in all models. A main model was  
283 produced including all effects sizes. Several exploratory sub-group model analyses were also conducted  
284 and detailed in the pre-registration with slight departure here because of the coding process for methods

285 to capture ratings of perception of effort. In addition to a model for all studies, we also produced models  
286 for only studies where ratings of perception of effort were captured as *effort dissociated*, *effort not*  
287 *dissociated*, and *unclear* separately. Further, in all models we additionally sub-grouped for tasks as  
288 ‘maximal’ (*i.e.*, ratings of perception of effort captured at the point of task failure or during a similar  
289 maximal task e.g., an MVC), and ‘submaximal’ (*i.e.*, ratings of perception of effort recorded during  
290 exercise prior to the point of task failure, or during tasks not necessarily requiring participants to reach  
291 task failure e.g., a fixed duration task of absolute demands). This was to separate potential ceiling effects  
292 of maximal task conditions. Note, in the preregistration we initially stated we would calculate a pooled  
293 effect for all submaximal values reported in any given study. However, to increase the number of effect  
294 sizes for analysis, and thus statistical power, we opted to calculate each separately and thus use a multilevel  
295 mixed effects meta-analysis model to account for this. For each sub-group analysis multilevel models were  
296 produced except for the ‘*effort not dissociated*’ ‘maximal’ conditions where only one effect size was  
297 available.

298 In contrast to our pre-registration, and in light of the heterogeneity and poor reporting of methods to  
299 capture ratings of perception of effort, dichotomizing the existence of an effect for the main results was  
300 avoided. Therefore, traditional null hypothesis significance testing, which has been extensively critiqued  
301 [66, 67], was not employed. Instead, the implications of all results compatible with these data, from the  
302 lower limit to the upper limit of the interval estimates, was considered with the greatest interpretive  
303 emphasis placed on the point estimate.

304 Risk of small study bias was examined visually through contour-enhanced funnel plots.  $Q$  and  $I^2$   
305 statistics were also produced and reported [68]. A significant  $Q$  statistic is typically considered indicative  
306 of effects likely not being drawn from a common population.  $I^2$  values indicate the degree of heterogeneity  
307 in the effects: 0-40% were not important, 30-60% moderate heterogeneity, 50-90% substantial  
308 heterogeneity, and 75-100% considerable heterogeneity [56]. For within participant effects pre-post  
309 correlations for measures were rarely reported; thus, a range of values for correlation coefficients ( $r = 0.5$ ,  
310  $0.7$ , and  $0.9$ ) and explored the sensitivity of results to each of these was assumed. As overall findings were  
311 relatively insensitive to this range, the results for  $r = 0.7$  are reported here. Results for inclusion of the  
312 other assumed correlation coefficients are reported in the supplementary material available on OSF ( $r =$   
313  $0.5$ , <https://osf.io/gqby6/>;  $r = 0.9$ , <https://osf.io/qbe2n/>). [graphical display of study heterogeneity; 69]

314

315

### 316 **3. Results**

317 The search across all databases returned 902 articles. After the removal of 319 duplicates, 583 original  
318 articles remained and were screened at the title/abstract level, leaving 80 articles. A total of 18 articles  
319 were retained. The screening process is shown in figure 3. None of the included articles defined the  
320 perception of effort nor provided instructions for rating it. Therefore, included studies could not be coded  
321 on that basis and instead, other cues have been used (see figure 2a). Based upon this, among the 18 articles,  
322 only 6 could be classified in the *effort dissociated* group, while 4 were placed in the *effort not dissociated*  
323 group and 8 in the *unclear* group. The pooled number of participants in the studies included for qualitative  
324 analysis was 163 across 21 groups within the 18 studies, and with sample sizes ranging from 5 to 16  
325 participants (median = 8). However, data was not available for quantitative synthesis in 2 studies, both  
326 belonging to the *effort not-dissociated* group thus reducing the sample size on which quantitative synthesis  
327 was based to  $n = 164$ . Full details of all studies included in quantitative synthesis can be seen in the data  
328 extraction table (<https://osf.io/ku3w7/>).

329 **\*\*Please insert figure 3 here\*\***

330

#### 331 **Risks of bias**

332 None of the studies were labelled “strong”, whereas 5 were “moderate” and 13 “weak”. Most studies  
333 used a randomized or counter-balanced within-subject design, but 7 studies were classified as cohort  
334 studies (pre-test, post-test). Almost half ( $n = 7$ ) of the studies were deemed to have strongly controlled for  
335 known confounders of the perception of effort, but 6 of them were labelled “moderate”, with the remaining  
336 5 being considered “weak”. None of the studies described how the assessor was blinded except for one  
337 [70]. In contrast, 5 studies blinded their participants with a placebo injection. The remaining 13 studies  
338 compared the epidural anaesthesia with a “no-intervention” control condition and the participants could  
339 therefore not be considered blind. Furthermore, none of the included studies reported asking the  
340 participants to guess the order of the intervention after completion of the protocols. All studies used either  
341 the Borg’s scale (RPE 6-20) or the CR10 scale, which are known psychophysical scales in the context of  
342 physical exercise. However, several ( $n = 9$ ) articles reported to have used a modified version of the CR10  
343 scale without providing any information on the modifications performed. The validity and reliability of  
344 these modifications were therefore unclear. The table 1 shows the risk of bias within studies for every  
345 included articles. An audit trail is available in the supplementary material 2.

346 **\*\*Please insert table 1 here\*\***

347

## 348 **Meta-Analysis**

349 The quantitative analysis could be performed on only 16 studies, the remaining two providing  
350 insufficient information. The main model including all combined effects sizes ( $k = 49$  across 16 clusters  
351 [median = 2, range = 1 to 8 effects per cluster]) revealed a negative trivial point estimate with precision  
352 ranging from negative small to positive trivial effects for the interval estimate (-0.05 [95% CIs = -0.28 to  
353 0.18]), yet with moderate to substantial heterogeneity ( $Q_{(48)} = 127.22$ ,  $p < 0.0001$ ,  $I^2_{\text{between\_study}} = 77\%$ ,  
354  $I^2_{\text{between\_group}} = 0\%$ ,  $I^2_{\text{within\_group}} = 0\%$ ). When considering only submaximal conditions the model ( $k = 39$   
355 across 13 clusters [median = 2, range = 1 to 8 effects per cluster]) revealed a point estimate close to zero  
356 with precision ranging from negative small to positive small effects for the interval estimate (0.05 [95% CIs  
357 = -0.32 to 0.42]), with substantial heterogeneity ( $Q_{(38)} = 103.00$ ,  $p < 0.0001$ ,  $I^2_{\text{between\_study}} = 77\%$ ,  
358  $I^2_{\text{between\_group}} = 0\%$ ,  $I^2_{\text{within\_group}} = 0\%$ ). Considering only maximal conditions the model ( $k = 10$  across 9  
359 clusters [median = 1, range = 1 to 2 effects per cluster]) revealed a negative small point estimate with  
360 precision ranging from negative moderate to positive trivial effects for the interval estimate (-0.17  
361 [95% CIs = -0.47 to 0.13]), with moderate to substantial heterogeneity ( $Q_{(9)} = 22.92$ ,  $p = 0.0064$ ,  
362  $I^2_{\text{between\_study}} = 0\%$ ,  $I^2_{\text{between\_group}} = 30\%$ ,  $I^2_{\text{within\_group}} = 30\%$ ). Figure 4 presents the funnel plot for all studies  
363 with color coding by method for capturing rating of perception of effort. Figures 5 and 6 present all effect  
364 sizes for the submaximal models and the overall model estimates for all coding and combined.

365 **\*\*Please insert figure 4 here\*\***

366

367 ***Ratings of perception of effort as ‘effort dissociated’.*** The subgroup model where the method of rating  
368 of perception of effort was coded as *effort* ( $k = 19$  across 6 clusters [median = 2.5, range = 1 to 8 effects  
369 per cluster]) revealed an overall small point estimate with precision ranging from positive trivial to positive  
370 moderate effects for the interval estimate (0.39 [95% CIs = 0.13 to 0.64]), with relative homogeneity ( $Q_{(18)}$   
371 = 36.96,  $p = 0.0053$ ,  $I^2_{\text{between\_study}} = 77\%$ ,  $I^2_{\text{between\_group}} = 0\%$ ,  $I^2_{\text{within\_group}} = 49\%$ ). When considering only  
372 submaximal conditions the model ( $k = 16$  across 6 clusters [median = 2, range = 1 to 7 effects per cluster])  
373 revealed a small point estimate with precision ranging from positive trivial to positive large effects for  
374 the interval estimate (0.54 [95% CIs = 0.07 to 1.0]), with moderate to substantial heterogeneity ( $Q_{(15)} =$   
375 31.44,  $p = 0.0077$ ,  $I^2_{\text{between\_study}} = 51\%$ ,  $I^2_{\text{between\_group}} = 0\%$ ,  $I^2_{\text{within\_group}} = 8\%$ ). When considering only  
376 maximal conditions the model ( $k = 3$  across 3 clusters [1 effect per cluster]) revealed a negative trivial

377 point estimate with precision ranging from negative small to positive small effects for the interval estimate  
378 (-0.05 [95% CIs = -0.24 to 0.15]), with relative homogeneity ( $Q_{(2)} = 0.12$ ,  $p = 0.9412$ ,  $I^2_{\text{between\_study}} = 0\%$ ,  
379  $I^2_{\text{between\_group}} = 0\%$ ,  $I^2_{\text{within\_group}} = 0\%$ ).

380 **\*\*Please insert figure 5 here\*\***

381

382 ***Ratings of perception of effort as 'effort not dissociated'***. The subgroup model where the method of  
383 rating of perception of effort capture was coded as *effort not dissociated* ( $k = 8$  across 2 clusters [4 effects  
384 per cluster]) revealed an overall negative small point estimate with poor precision ranging from negative  
385 large to positive large effects for the interval estimate (-0.29 [95% CIs = -2.39 to 1.8]), with relative  
386 homogeneity ( $Q_{(7)} = 9.62$ ,  $p = 0.2113$ ,  $I^2_{\text{between\_study}} = 7\%$ ,  $I^2_{\text{between\_group}} = 7\%$ ,  $I^2_{\text{within\_group}} = 14\%$ ). When  
387 considering only submaximal conditions the model ( $k = 7$  across 2 clusters [median = 3.5, range = 3 to 4  
388 effects per cluster]) revealed a negative small point estimate poor precision ranging from negative large  
389 to positive large effects for the interval estimate (-0.32 [95% CIs = -3.07 to 2.42]), with moderate  
390 heterogeneity ( $Q_{(6)} = 9.51$ ,  $p = 0.1467$ ,  $I^2_{\text{between\_study}} = 12\%$ ,  $I^2_{\text{between\_group}} = 12\%$ ,  $I^2_{\text{within\_group}} = 20\%$ ). When  
391 considering only maximal conditions only a single effect met these conditions which revealed a negative  
392 small point estimate with precision ranging from negative moderate to positive small effects for the  
393 interval estimate (-0.22 [95% CIs = -0.76 to 0.33]).

394

395 ***Ratings of perception of effort as 'unclear'***. The subgroup model where the method of rating of  
396 perception of effort capture was coded as *unclear* ( $k = 22$  across 8 clusters [median = 2, range = 1 to 8  
397 effects per cluster]) revealed an overall negative small point estimate with precision ranging from negative  
398 moderate to negative trivial effects for the interval estimate (-0.27 [95% CIs = -0.50 to -0.04]), with  
399 moderate heterogeneity ( $Q_{(21)} = 42.14$ ,  $p = 0.004$ ,  $I^2_{\text{between\_study}} = 6\%$ ,  $I^2_{\text{between\_group}} = 0\%$ ,  $I^2_{\text{within\_group}} = 45\%$ ).  
400 When considering only submaximal conditions the model ( $k = 16$  across 5 clusters [median = 2, range =  
401 1 to 8 effects per cluster]) revealed a negative small point estimate with precision ranging from negative  
402 large to positive trivial effects for the interval estimate (-0.37 [95% CIs = -0.88 to 0.14]), with moderate to  
403 substantial heterogeneity ( $Q_{(15)} = 19.27$ ,  $p = 0.2020$ ,  $I^2_{\text{between\_study}} = 59\%$ ,  $I^2_{\text{between\_group}} = 0\%$ ,  $I^2_{\text{within\_group}} =$   
404  $0\%$ ). When considering only maximal conditions the model ( $k = 6$  across 5 clusters [median = 1, range =  
405 1 to 2 effects per cluster]) revealed a negative small point estimate with poor precision ranging from  
406 negative large to positive moderate effects for the interval estimate (-0.25 [95% CIs = -0.91 to 0.41]), with

407 considerable heterogeneity ( $Q_{(5)} = 22.47$ ,  $p = 0.004$ ,  $I^2_{\text{between\_study}} = 0\%$ ,  $I^2_{\text{between\_group}} = 39\%$ ,  $I^2_{\text{within\_group}} =$   
408 39%).

409 **\*\*Please insert figure 6 here\*\***

410

411



## 412 4. Discussion

413 This systematic review with meta-analysis was conducted to investigate the effect of pharmacologically  
414 blocking muscle afferents on the perception of effort during physical exercise. We also sought to explore  
415 the differences in reported perception of effort according to the approach used to investigate this construct.  
416 Eighteen articles were coded as *effort dissociated* (n = 6), *effort not dissociated* (n = 4) or *unclear* (n = 8)  
417 according to whether the authors included other exercise-related perceptions in the investigation of the  
418 perception of effort. Considering all subgroups combined, a trivial negative point estimate for ratings of  
419 perceived effort reduction following pharmacological blockade of muscle afferents was observed, with  
420 interval estimate ranging from negative small to positive trivial effects. The magnitude of the interval  
421 estimate crossing zero as well as the trivial negative point of estimate (0.05) suggests that regardless of  
422 the theoretical approach used to investigate the perception of effort, pharmacologically blocking muscle  
423 afferents feedback does not reduce the perception of effort during physical exercise.

424 The subgroup analysis also revealed a clear influence of the theoretical approach used to investigate the  
425 perception of effort (i.e., as a construct dissociated or not from other exercise-related perceptions). To the  
426 best of our knowledge, this systematic review is the first to highlight an influence of the theoretical  
427 approach used to investigate this perception, and strongly suggests that future experimental studies should  
428 carefully report the instructions provided to the participants for rating perception of effort.

429 ***Effort dissociated subgroup.*** Only considering the *effort dissociated* subgroup, pooling 6 studies  
430 yielded a small positive point estimate with a positive confidence interval suggesting that impairing group  
431 III-IV muscle afferents increased ratings of perceived effort. Participants working at the same absolute  
432 demands (i.e., same external workload in both conditions) reported higher perception of effort with  
433 epidural anesthesia [32, 33, 37]. However, when working at similar relative intensities (i.e., taking into  
434 consideration any muscle strength reduction following injection of local anesthetic [36]), the same  
435 participants reported similar perception of effort. Likewise, ratings of perceived effort were also similar  
436 at a given oxygen uptake during graded exercises [32, 37]. The *effort dissociated* subgroup also showed  
437 relatively low heterogeneity, though for submaximal tasks the majority came from between study factors.  
438 Differences across studies could be explained by differences in experimental designs [69], as results  
439 differed with the calibration of exercise demands according to absolute or relative workloads. It is also  
440 important to note that the increased perception of effort in these studies is likely due to the use of lidocaine  
441 and/or bupivacaine to block III-IV muscle afferent feedback. Indeed, contrary to fentanyl which acts more  
442 specifically on sensory transmission [71], lidocaine and bupivacaine is known to affect sodium and  
443 potassium channels [72] and reduce force production capacity [73] thereby requiring the participants to

444 increase their motor command to maintain the same absolute workload. According to the corollary  
445 discharge model, this increased motor command increases the magnitude of the associated corollary  
446 discharge, which in turn increases the perception of effort [21]. This subgroup analysis reveals that when  
447 effort is investigated as dissociated from other exercise-related perceptions, pharmacological blockade of  
448 muscle afferents does not reduce perception of effort. Therefore, as perception of effort is not reduced,  
449 muscle afferent feedback cannot be considered as a sensory signal processed by the brain to generate the  
450 perception of effort. This result reinforces the potential of using the perception of effort intensity as a  
451 psychophysiological index of the motor command [21, 25, 74-76], as traditionally performed in the  
452 neuroscience, cardiovascular physiology and kinesthesia literatures [21-25].

453 ***Effort not-dissociated subgroup.*** Only considering the *effort not dissociated* subgroup, pooling 2  
454 studies yielded an overall small negative point estimate. This negative point estimate was associated with  
455 an important imprecision based upon the confidence interval range likely due to the low number of studies  
456 and small cluster sample correction for robust estimates. Both studies observed lower ratings of perceived  
457 effort in epidurally anaesthetized participants [31, 70]. Interestingly, Amann et al. [31] observed lower  
458 ratings of perceived effort only at higher cycling power output (*i.e.*, 80% peak power output,  $325 \pm 19$  W).  
459 Participants reported similar ratings of perceived effort at 50, 100 and 150 W. Likewise, chronic  
460 obstructive pulmonary disease patients performing a constant-load cycling protocol at 80% peak power  
461 output tended to report lower perceived effort intensity at iso-time points [70]. These authors found similar  
462 ratings of perceived effort at exhaustion. According to the Oxford Dictionary, discomfort can be defined  
463 as a slight pain and something that makes a person feel physically uncomfortable. Because of its relation  
464 to the concept of pain, the inclusion of discomfort in the definition of the perception of effort may bias the  
465 ratings of perceived effort whenever there is a change in the perception of pain [13, 77]. Although there  
466 seems to exist wide interindividual variability in pain threshold during cycle ergometry, muscle pain is  
467 known to increase with increased exercise demands during this task [78]. Attending to these perceptions  
468 when measuring the perception of effort may attenuate the perceptual differences between conditions  
469 during lower cycling demands where discomfort is already low and thus, any difference with epidural  
470 anesthesia would likely be minimal. Conversely, when working at 80% peak power output, participants  
471 reported substantially lower ratings of perceived effort with epidural anesthesia, probably because they  
472 felt less discomfort and/or pain than they normally would have. Pain and associated unpleasant sensations  
473 are transmitted through group III-IV fibres [79], and thus are attenuated with epidural anesthesia. Amann  
474 et al., [31] and Gagnon et al. [70] both observed lower ratings of perceived effort, suggesting that the  
475 reduction in muscle pain and associated discomfort may have biased the ratings of perceived effort when  
476 other exercise-related perceptions were included in the definition of effort. A study employing a self-paced

477 protocol that could not be added to this meta-analysis found similar results [36]. Participants performed a  
478 5-km cycling time trial with and without lidocaine with a mean power output similar to that of Amann et  
479 al. [31]. The authors however found a decrease in ratings of perceived effort of nearly 2 unit-points on the  
480 CR10 scale (CTRL:  $8.4 \pm 0.4$  SEM; Lidocaine:  $6.8 \pm 0.4$  SEM). Given the high-power output, the fact  
481 that feedback from group III-IV is known to be the signal processed by the brain to generate muscle pain  
482 [79], and that the authors reported investigating “limb discomfort”, the lower values likely reflect a  
483 decreased pain and discomfort when cycling with lidocaine. As such, the inclusion of discomfort in the  
484 definition of effort would likely result in a decrease in reported ratings of perceived effort. Interestingly,  
485 a similar protocol, with the only difference of using fentanyl instead of lidocaine, observed an increase in  
486 ratings of perceived effort at the completion of the 5 km time-trial [58]. However, the authors also  
487 observed an excessive development of fatigue resulting in an increase in central motor drive, known to  
488 exacerbate the perception of effort [3, 21, 25, 28]. Moreover, when an effect of the epidural anesthesia is  
489 detected (e.g., 13% reduction in “limb discomfort”[31]), the magnitude of its effect is small. Even when  
490 the theoretical approach encompasses several exercise-related perceptions, the contribution of group III-  
491 IV muscle afferents appears to be limited as previously suggested [77].

492 ***Unclear subgroup.*** Only considering the *unclear* subgroup, pooling 8 articles yielded an overall small  
493 negative point estimate with a negative confidence interval. Among those articles, 2 observed lower ratings  
494 of perceived effort at task failure when exercising with impaired muscle afferents with similar integrated  
495 forces between conditions [80, 81]. Interestingly, 2 other studies observed similar ratings of perceived  
496 effort at task failure. Amann et al. [58] found a 27% decrease in perception of effort intensity with epidural  
497 anesthesia at the 3-min mark (average time, placebo:  $8.7 \pm 0.3$ , fentanyl:  $6.8 \pm 0.3$ ), but not at exhaustion  
498 in trained athletes cycling at 80% of their peak power output previously measured. Similarly, Sidhu et al.  
499 [82] observed a decrease in perception of effort intensity with epidural anesthesia only at 25% of  
500 endurance time during a similar exercise protocol. It must be noted that a 1-unit difference on the CR10  
501 was consistently maintained throughout the protocol (25% endurance time [ET],  $5.9 \pm 0.4$  vs  $4.9 \pm 0.4$ ;  
502 50% ET,  $8.3 \pm 0.3$  vs  $7.4 \pm 0.5$ ; 70% ET,  $9.4 \pm 0.2$ ,  $8.5 \pm 0.3$ ), until exhaustion where values were nearly  
503 identical (100% ET,  $9.9 \pm .01$  vs  $10.0 \pm 0$ ). It is indicative of a tendency for ratings of perceived effort to  
504 be lower in the epidural anesthesia condition, albeit not reaching statistical significance. Similar values at  
505 the end of the endurance time would also be consistent with previous studies suggesting that the perception  
506 of effort attain near maximal values at exhaustion [e.g., 83]. Three other studies using fentanyl in  
507 hypertensive and heart failure patients also did not find different ratings of perceived effort compared to  
508 a sham or control condition [38, 84, 85]. Exercise demands, determined with cycling power output, was  
509 extremely low in one of the studies (40 W; [84]). Because participants reported similar ratings of perceived

510 effort when also considering discomfort at lower intensities [31] and that fentanyl does not lead to loss in  
511 muscle strength [73], it is not possible to determine which was the cause of the lack of differences.  
512 However, when exercising at higher intensities (*e.g.*, 65% - 80%  $W_{peak}$ ), healthy controls and heart failure  
513 participants reported similar ratings of perceived effort during both conditions [38]. Furthermore, healthy  
514 and heart failure participants did not differ in ratings of perceived effort despite large differences in  
515 external workload [38], further suggesting that it is the relative and not the absolute workload determining  
516 the perception of effort.

517 Although the involvement of the central motor drive in the perception of effort seems widely accepted  
518 [21, 24, 36], there is still confusion about the role of group III-IV muscle afferents as a signal processed  
519 by the brain to generate the perception of effort [13, 27]. In fact, physiologists have still not reached a  
520 consensus after more than 150 years of debate [86-89]. Central projections of group III-IV muscle afferents  
521 to several spinal and supra-spinal sites, including sensory cortices, anatomically support the afferent  
522 feedback model [90, 91]. This model also finds experimental evidence from studies involving epidural  
523 anesthesia [31, 70]. However, as mentioned above, the inclusion of other exercise-related perceptions  
524 likely biased the ratings of perceived effort measured. Furthermore, if these muscle afferents constitute a  
525 centrally processed signal generating the perception of effort, stimulation of group III-IV muscle afferents  
526 would generate a sense of effort even in the absence of central motor drive. However, injections of  
527 physiological concentrations of metabolites known to stimulate those muscle afferents do not generate  
528 perception of effort at rest [92]. This manipulation however elicits sensations related to discomfort (*e.g.*,  
529 itch, tingling) and pain. It appears that the presence of the motor command, and therefore the voluntary  
530 engagement of the participant in the task, is crucial for experiencing the perception of effort.

531 There is extensive support that the neurocognitive processing of the corollary discharge generates the  
532 perception of effort. First, significant correlations between the ratings of perceived effort and the amplitude  
533 of movement-related cortical potential (MRCP), an index of the motor command, have previously been  
534 observed [21, 25, 74, 93, 94]. For example, a reduction in force production capacity is associated with an  
535 increased MRCP amplitude and an increased perception of effort intensity to maintain the same absolute  
536 force [21]. When caffeine is ingested, perception of effort intensity to maintain the same absolute force is  
537 reduced in association with a decreased MRCP amplitude [25]. This positive effect of caffeine on the  
538 perception of effort is most likely due to the increased excitability of the corticospinal pathway induced  
539 by its ingestion [95-97], leading to a lower motor command required to activate the working muscles as  
540 revealed by the decreased MRCP amplitude. Second, support in favor of the role of the corollary discharge  
541 as an internal signal generating the perception of effort can be found in various neuroscience or

542 psychophysiological studies. For example, Zenon et al [98] demonstrated that disrupting the  
543 supplementary motor area via continuous theta burst transcranial magnetic stimulation increases  
544 perception of effort. Other studies demonstrated a close relationship between perception of effort and  
545 physiological variables known to be strongly influenced by the motor command, such as the respiratory  
546 frequency [99] or the electromyographic signal [76].

### 547 **Strengths and limitations**

548 One strength of this systematic review is that our search was not restrained by publication date, despite  
549 the articles spanning three decades. Rather, the shift from muscle weakness-inducing lidocaine and  
550 bupivacaine to the highly selective  $\mu$ -opioid receptor agonist fentanyl demonstrated the importance of the  
551 magnitude of the central motor drive in generating the perception of effort. In the presence of muscle  
552 weakness (induced by some opioids binding to spinal motoneurons), exercisers must increase the  
553 magnitude of their motor command to maintain the same absolute level of performance [30]. This was  
554 observed in older studies via the higher ratings of perceived effort reported when participants were  
555 working at similar external workload [e.g., 37, 100]. Another strength of this meta-analysis is that we  
556 opted to pool the data per time-point, instead of averaging the ratings of perceived effort within studies.  
557 This allows us to avoid any potential ceiling effects from maximal conditions, where ratings of perceived  
558 effort are expected to attain near maximal values. Moreover, having each effect reported in each study  
559 increased the number of effect sizes and thus the statistical power and the precision of this meta-analysis.

560 One limitation of this systematic review is that none of the included studies explicitly provided the  
561 definition of the perception of effort, or the instructions given to the participants to report their ratings of  
562 perceived effort. Therefore, to overcome this limitation, a unique coding was created to be able to classify  
563 the included articles based on cues leading to the assumption or not of the inclusion of other exercise-  
564 related perceptions in the definition of effort. While some may argue that such approach opens the doors  
565 for interpretation, we would like to emphasize that the coding process was clear and objective, and could  
566 be reproduced by other research groups, as presented in figure 2a. We are therefore confident that our  
567 coding process was successful at separating studies according to the definition of the perception of effort  
568 used and the associated approach used by the researcher (dissociated perception or not). Importantly, this  
569 limitation strongly emphasizes the need for better reporting of the definition of the perception of effort  
570 and associated instructions provided to the participants in the methods or in supplementary materials.  
571 Moreover, we had far fewer studies in the *effort not dissociated* group than the other 2 groups, decreasing  
572 the precision of the meta-analysis for this group.

573 **Conclusion**

574 Our results indicate that the group III-IV muscle afferents does not contribute as a signal processed by  
575 the brain to generate the perception of effort. Therefore, during voluntary movements, the perception of  
576 effort appears to be generated by the brain processing of the corollary discharge associated with the motor  
577 command. This meta-analysis also underscores the importance to provide clear and standardized  
578 instructions to the participants to avoid the confounding effect of other exercise-related perceptions in the  
579 ratings of perceived effort. We therefore recommend, similarly to others [13, 27, 101], that researchers  
580 and clinicians instruct their participants to rate their perception of effort specifically by excluding other  
581 exercise-related perception. Such approach is crucial for researchers investigating the perception of effort  
582 as a psychophysiological marker of the magnitude of the motor command [e.g., 74, 76] and using muscle  
583 pain as a psychophysiological marker of feedback from group III-IV muscle afferents [e.g., 102, 103].  
584 Investigating effort as a unique and dissociated perception is also crucial to better understand how  
585 perception of effort interacts with other exercise-related perceptions, such as pain, and influence  
586 performance and the regulation of human behavior. It could unravel underlying mechanisms generating  
587 and regulating the perception of effort, and lead to the development of unique multidisciplinary  
588 interventions aimed at decreasing perception of effort to improve the adherence to an exercise training  
589 program [e.g., 104].

590

591 **Acknowledgements**

592 The authors warmly thank the librarian Marc-Olivier Croteau for his precious assistance.

593



594

## 595 **5. Bibliography**

- 596 1. Gaveau J, Grospretre S, Berret B, Angelaki DE, Papaxanthis C. A cross-species neural  
597 integration of gravity for motor optimization. *Science Advances*. 2021;7(15):eabf7800.
- 598 2. Izawa J, Rane T, Donchin O, Shadmehr R. Motor Adaptation as a Process of Reoptimization.  
599 *The Journal of Neuroscience*. 2008;28(11):2883-91.
- 600 3. Pageaux B, Lepers R. Fatigue induced by physical and mental exertion increases perception of  
601 effort and impairs subsequent endurance performance. *Frontiers in physiology*. 2016 2016;7:587.
- 602 4. Cook DB, O'Connor PJ, Lange G, Steffener J. Functional neuroimaging correlates of mental  
603 fatigue induced by cognition among chronic fatigue syndrome patients and controls. *NeuroImage*. 2007  
604 2007/05/15/;36(1):108-22.
- 605 5. Barhorst EE, Andrae WE, Rayne TJ, Falvo MJ, Cook DB, Lindheimer JB. Elevated Perceived  
606 Exertion in People with Myalgic Encephalomyelitis/Chronic Fatigue Syndrome and Fibromyalgia: A  
607 Meta-analysis. *Medicine & Science in Sports & Exercise*. 2020;52(12):2615-27.
- 608 6. Kuppuswamy A, Clark EV, Turner IF, Rothwell JC, Ward NS. Post-stroke fatigue: a deficit in  
609 corticomotor excitability? *Brain*. 2014;138(1):136-48.
- 610 7. Fernandez C, Firdous S, Jehangir W, Behm B, Mehta Z, Berger A, et al. Cancer-Related Fatigue:  
611 Perception of Effort or Task Failure? *American Journal of Hospice and Palliative Medicine®*.  
612 2020;37(1):34-40.
- 613 8. Piña IL, Apstein CS, Balady GJ, Belardinelli R, Chaitman BR, Duscha BD, et al. Exercise and  
614 heart failure: a statement from the American Heart Association Committee on exercise, rehabilitation,  
615 and prevention. *Circulation*. 2003 2003;107(8):1210-25.
- 616 9. AACVPR. Guidelines for cardiac rehabilitation and secondary prevention programs: Human  
617 Kinetics; 2013.
- 618 10. Eston R, Parfitt G. Perceived exertion, heart rate and other non-invasive methods for exercise  
619 testing and intensity control. *Kinanthropometry and Exercise Physiology: Volume One: Anthropometry*.  
620 2018 2018:464.
- 621 11. Impellizzeri FM, Rampinini E, Coutts AJ, Sassi A, Marcora SM. Use of RPE-based training load  
622 in soccer. *Medicine & Science in sports & exercise*. 2004 2004;36(6):1042-7.
- 623 12. ACSM. ACSM's exercise testing and prescription: Lippincott williams & wilkins; 2017.
- 624 13. Pageaux B. Perception of effort in exercise science: definition, measurement and perspectives.  
625 *European Journal of Sport Science*. 2016 2016;16(8):885-94.
- 626 14. Smirmaul BdPC. Sense of effort and other unpleasant sensations during exercise: clarifying  
627 concepts and mechanisms. *Br J Sports Med*. 2012 2012;46(5):308-11.
- 628 15. Steele J. What is (perception of) effort? Objective and subjective effort during task performance.  
629 *PsyArXiv*. 2020 2020.
- 630 16. St Gibson AC, Lambert EV, Rauch LHG, Tucker R, Baden DA, Foster C, et al. The role of  
631 information processing between the brain and peripheral physiological systems in pacing and perception  
632 of effort. *Sports medicine*. 2006 2006;36(8):705-22.
- 633 17. Noble BJ, Robertson RJ. The Borg scale: development, administration and experimental use.  
634 *Perceived exertion: Champaign: Human Kinetics; 1996*. p. 59-89.
- 635 18. Tucker R. The anticipatory regulation of performance: the physiological basis for pacing  
636 strategies and the development of a perception-based model for exercise performance. *British journal of*  
637 *sports medicine*. 2009 2009;43(6):392-400.

- 638 19. Amann M, Venturelli M, Ives SJ, McDaniel J, Layec G, Rossman MJ, et al. Peripheral fatigue  
639 limits endurance exercise via a sensory feedback-mediated reduction in spinal motoneuronal output.  
640 *Journal of applied physiology*. 2013 2013;115(3):355-64.
- 641 20. Keller JL, Housh TJ, Hill EC, Smith CM, Schmidt RJ, Johnson GO. Neuromuscular responses of  
642 recreationally active women during a sustained, submaximal isometric leg extension muscle action at a  
643 constant perception of effort. *European journal of applied physiology*. 2018 2018;118(12):2499-508.
- 644 21. de Morree HM, Klein C, Marcora SM. Perception of effort reflects central motor command  
645 during movement execution. *Psychophysiology*. 2012 2012;49(9):1242-53.
- 646 22. Enoka RM, Stuart DG. Neurobiology of muscle fatigue. *Journal of applied physiology*. 1992  
647 1992;72(5):1631-48.
- 648 23. Taylor JL. Proprioception. 2009 2009.
- 649 24. Winchester PK, Williamson JW, Mitchell JH. Cardiovascular responses to static exercise in  
650 patients with Brown-Sequard syndrome. *The Journal of physiology*. 2000 2000;527(Pt 1):193.
- 651 25. de Morree HM, Klein C, Marcora SM. Cortical substrates of the effects of caffeine and time-on-  
652 task on perception of effort. *Journal of Applied Physiology*. 2014 2014;117(12):1514-23.
- 653 26. Pageaux B, Gaveau J. Studies using pharmacological blockade of muscle afferents provide new  
654 insights into the neurophysiology of perceived exertion. *The Journal of physiology*. 2016  
655 2016;594(18):5049.
- 656 27. Marcora SM. Perception of effort during exercise is independent of afferent feedback from  
657 skeletal muscles, heart, and lungs. *Journal of applied physiology*. 2009 2009;106(6):2060-2.
- 658 28. Marcora SM, Bosio A, De Morree HM. Locomotor muscle fatigue increases cardiorespiratory  
659 responses and reduces performance during intense cycling exercise independently from metabolic stress.  
660 *American Journal of Physiology-Regulatory, Integrative and Comparative Physiology*. 2008  
661 2008;294(3):R874-R883.
- 662 29. Weavil JC, Amann M. Corticospinal excitability during fatiguing whole body exercise. *Progress*  
663 *in brain research*. 2018 2018;240:219-46.
- 664 30. Gandevia SC. Spinal and supraspinal factors in human muscle fatigue. *Physiological reviews*.  
665 2001 2001.
- 666 31. Amann M, Blain GM, Proctor LT, Sebranek JJ, Pegelow DF, Dempsey JA. Group III and IV  
667 muscle afferents contribute to ventilatory and cardiovascular response to rhythmic exercise in humans.  
668 *Journal of Applied Physiology*. 2010 2010;109(4):966-76.
- 669 32. Fernandes A, Galbo H, Kjaer M, Mitchell JH, Secher NH, Thomas SN. Cardiovascular and  
670 ventilatory responses to dynamic exercise during epidural anaesthesia in man. *The Journal of*  
671 *physiology*. 1990 1990;420(1):281-93.
- 672 33. Smith SA, Querry RG, Fadel PJ, Gallagher KM, Strømstad M, Ide K, et al. Partial blockade of  
673 skeletal muscle somatosensory afferents attenuates baroreflex resetting during exercise in humans. *The*  
674 *Journal of physiology*. 2003 2003;551(3):1013-21.
- 675 34. Amann M, Venturelli M, Ives SJ, Morgan DE, Gmelch B, Witman MA, et al. Group III/IV  
676 muscle afferents impair limb blood in patients with chronic heart failure. *International journal of*  
677 *cardiology*. 2014;174(2):368-75.
- 678 35. Amann M, Wan H-Y, Thurston TS, Georgescu VP, Weavil JC. On the influence of group III/IV  
679 muscle afferent feedback on endurance exercise performance. *Exercise and Sport Sciences Reviews*.  
680 2020 2020;48(4):209-16.
- 681 36. Amann M, Proctor LT, Sebranek JJ, Eldridge MW, Pegelow DF, Dempsey JA. Somatosensory  
682 feedback from the limbs exerts inhibitory influences on central neural drive during whole body  
683 endurance exercise. *Journal of applied physiology*. 2008 2008;105(6):1714-24.
- 684 37. Kjaer M, Secher NH, Bach FW, Sheikh S, Galbo H. Hormonal and metabolic responses to  
685 exercise in humans: effect of sensory nervous blockade. *American Journal of Physiology-Endocrinology*  
686 *And Metabolism*. 1989 1989;257(1):E95-E101.

- 687 38. Olson TP, Joyner MJ, Eisenach JH, Curry TB, Johnson BD. Influence of locomotor muscle  
688 afferent inhibition on the ventilatory response to exercise in heart failure. *Experimental physiology*.  
689 2014 2014;99(2):414-26.
- 690 39. Borg GAV. Physical performance and perceived exertion. 1962 1962.
- 691 40. Borg GAV. Borg's perceived exertion and pain scales: Human kinetics; 1998.
- 692 41. Gamberale F. Perception of effort in manual materials handling. *Scandinavian journal of work,*  
693 *environment & health*. 1990:59-66.
- 694 42. Hamilton AL, Killian KJ, Summers E, Jones NL. Quantification of intensity of sensations during  
695 muscular work by normal subjects. *Journal of Applied Physiology*. 1996 1996;81(3):1156-61.
- 696 43. O'Connor PJ, Cook DB. Moderate-intensity muscle pain can be produced and sustained during  
697 cycle ergometry. *Medicine & Science in Sports & Exercise*. 2001 2001;33(6):1046-51.
- 698 44. Christian RJ, Bishop D, Girard O, Billaut F. The role of sense of effort on self-selected cycling  
699 power output. *Frontiers in physiology*. 2014 2014;5:115.
- 700 45. Steele J, Fisher J, McKinnon S, McKinnon P. Differentiation between perceived effort and  
701 discomfort during resistance training in older adults: reliability of trainee ratings of effort and  
702 discomfort, and reliability and validity of trainer ratings of trainee effort. *Journal of Trainology*. 2016  
703 2016;6(1):1-8.
- 704 46. Stuart C, Steele J, Gentil P, Giessing J, Fisher JP. Fatigue and perceptual responses of heavier-  
705 and lighter-load isolated lumbar extension resistance exercise in males and females. *PeerJ*. 2018  
706 2018;6:e4523.
- 707 47. Jones LA. The senses of effort and force during fatiguing contractions. 1995 1995: Springer;  
708 1995. p. 305-13.
- 709 48. McCloskey DI, Ebeling P, Goodwin GM. Estimation of weights and tensions and apparent  
710 involvement of a "sense of effort". *Experimental neurology*. 1974 1974;42(1):220-32.
- 711 49. Marcora S. Psychobiology of fatigue during endurance exercise. *Endurance performance in*  
712 *sport: Routledge*; 2019. p. 15-34.
- 713 50. Richter M, Gendolla GH, Wright RA. Three decades of research on motivational intensity  
714 theory: What we have learned about effort and what we still don't know. *Advances in motivation*  
715 *science: Elsevier*; 2016. p. 149-86.
- 716 51. Preston J, Wegner DM. Elbow grease: When action feels like work. *Social cognition and social*  
717 *neuroscience Oxford handbook of human action*. 2009 2009:569-86.
- 718 52. Marcora SM. Perception: Effort of. *Encyclopedia of perception*. Goldstein, E. B. ed. Thousand  
719 Oak, CA: Sage; 2010. p. 380-3.
- 720 53. Liberati A, Altman DG, Tetzlaff J, Mulrow C, Gøtzsche PC, Ioannidis JPA, et al. The PRISMA  
721 statement for reporting systematic reviews and meta-analyses of studies that evaluate health care  
722 interventions: explanation and elaboration. *Journal of clinical epidemiology*. 2009 2009;62(10):e1-e34.
- 723 54. McCormick A, Meijen C, Marcora SM. Psychological determinants of whole-body endurance  
724 performance. *Sports medicine*. 2015 2015;45(7):997-1015.
- 725 55. Thomas BH, Ciliska D, Dobbins M, Micucci S. A process for systematically reviewing the  
726 literature: providing the research evidence for public health nursing interventions. *Worldviews on*  
727 *Evidence-Based Nursing*. 2004 2004;1(3):176-84.
- 728 56. Higgins, Green S. *Cochrane handbook for systematic reviews of interventions*. Version 5.1. 0  
729 [updated March 2011]. The Cochrane Collaboration. [www.cochrane-handbook.org](http://www.cochrane-handbook.org). 2011 2011.
- 730 57. Kjær M, Hanel B, Worm L, Perko G, Lewis SF, Sahlin K, et al. Cardiovascular and  
731 neuroendocrine responses to exercise in hypoxia during impaired neural feedback from muscle.  
732 *American Journal of Physiology-Regulatory, Integrative and Comparative Physiology*. 1999  
733 1999;277(1):R76-R85.

- 734 58. Amann M, Blain GM, Proctor LT, Sebranek JJ, Pegelow DF, Dempsey JA. Implications of  
735 group III and IV muscle afferents for high-intensity endurance exercise performance in humans. *The*  
736 *Journal of physiology*. 2011 2011;589(21):5299-309.
- 737 59. Chaney MA. Side effects of intrathecal and epidural opioids. *Canadian Journal of Anaesthesia*.  
738 1995 1995;42(10):891-903.
- 739 60. Schnoll RA, Epstein L, Audrain J, Niaura R, Hawk L, Shields PG, et al. Can the blind see?  
740 Participant guess about treatment arm assignment may influence outcome in a clinical trial of bupropion  
741 for smoking cessation. *Journal of substance abuse treatment*. 2008 2008;34(2):234-41.
- 742 61. Viechtbauer W. Conducting meta-analyses in R with the metafor package. *Journal of statistical*  
743 *software*. 2010 2010;36(3):1-48.
- 744 62. Becker BJ. Synthesizing standardized mean-change measures. *British Journal of Mathematical*  
745 *and Statistical Psychology*. 1988 1988;41(2):257-78.
- 746 63. Morris SB. Estimating effect sizes from pretest-posttest-control group designs. *Organizational*  
747 *research methods*. 2008 2008;11(2):364-86.
- 748 64. Morris SB. Distribution of the standardized mean change effect size for meta-analysis on  
749 repeated measures. *British Journal of Mathematical and Statistical Psychology*. 2000 2000;53(1):17-29.
- 750 65. Cohen J. *Statistical Power Analysis for the Behavioral Sciences*. Hillsdale: Erlbaum. Conner, BE  
751 (1988). *The Box in the Barn*. Columbus: Highlights for ...; 1988.
- 752 66. Amrhein V, Greenland S, McShane B. Scientists rise up against statistical significance. *Nature*.  
753 2019 2019;305-7.
- 754 67. McShane BB, Gal D, Gelman A, Robert C, Tackett JL. Abandon statistical significance. *The*  
755 *American Statistician*. 2019 2019;73(sup1):235-45.
- 756 68. Higgins, Thompson SG, Deeks JJ, Altman DG. Measuring inconsistency in meta-analyses. *Bmj*.  
757 2003 2003;327(7414):557-60.
- 758 69. Olkin I, Dahabreh IJ, Trikalinos TA. GOSH—a graphical display of study heterogeneity. *Research*  
759 *Synthesis Methods*. 2012 2012;3(3):214-23.
- 760 70. Gagnon P, Bussi eres JS, Ribeiro F, Gagnon SL, Saey D, Gagn e N, et al. Influences of spinal  
761 anesthesia on exercise tolerance in patients with chronic obstructive pulmonary disease. *American*  
762 *journal of respiratory and critical care medicine*. 2012 2012;186(7):606-15.
- 763 71. Kanai A, Osawa S, Suzuki A, Ozawa A, Okamoto H, Hoka S. Regression of sensory and motor  
764 blockade, and analgesia during continuous epidural infusion of ropivacaine and fentanyl in comparison  
765 with other local anesthetics. *Pain Medicine*. 2007;8(7):546-53.
- 766 72. Olschewski A, Hempelmann G, Vogel W, Safronov BV. Blockade of Na<sup>+</sup> and K<sup>+</sup> currents by  
767 local anesthetics in the dorsal horn neurons of the spinal cord. *The Journal of the American Society of*  
768 *Anesthesiologists*. 1998;88(1):172-9.
- 769 73. Amann M, Proctor LT, Sebranek JJ, Pegelow DF, Dempsey JA. Opioid-mediated muscle  
770 afferents inhibit central motor drive and limit peripheral muscle fatigue development in humans. *The*  
771 *Journal of Physiology*. 2009 2009;587(1):271-83.
- 772 74. Jacquet T, Lepers R, Poulin-Charronnat B, Bard P, Pfister P, Pageaux B. Mental fatigue induced  
773 by prolonged motor imagery increases perception of effort and the activity of motor areas.  
774 *Neuropsychologia*. 2021 2021;150:107701.
- 775 75. Siemionow V, Yue GH, Ranganathan VK, Liu JZ, Sahgal V. Relationship between motor  
776 activity-related cortical potential and voluntary muscle activation. *Experimental Brain Research*.  
777 2000;133(3):303-11.
- 778 76. Kozlowski B, Pageaux B, Hubbard EF, Peters BS, Millar PJ, Power GA. Perception of effort  
779 during an isometric contraction is influenced by prior muscle lengthening or shortening. *European*  
780 *Journal of Applied Physiology*. 2021:1-12.
- 781 77. Marcora SM. Role of feedback from Group III and IV muscle afferents in perception of effort,  
782 muscle pain, and discomfort. *Journal of Applied Physiology*. 2011;110(5):1499-.



- 783 78. Cook DB, O'Connor PJ, Eubanks SA, Smith JC, Lee M. Naturally occurring muscle pain during  
784 exercise: assessment and experimental evidence. *Medicine and science in sports and exercise*.  
785 1997;29(8):999-1012.
- 786 79. O'Connor PJ, Cook DB. 5 Exercise and Pain: The Neurobiology, Measurement, and Laboratory  
787 Study of Pain in Relation to Exercise in Humans. *Exercise and sport sciences reviews*. 1999  
788 1999;27(1):119-66.
- 789 80. Broxterman RM, Layec G, Hureau TJ, Morgan DE, Bledsoe AD, Jessop JE, et al. Bioenergetics  
790 and ATP synthesis during exercise: role of group III/IV muscle afferents. *Medicine and science in sports  
791 and exercise*. 2017 2017;49(12):2404.
- 792 81. Broxterman RM, Hureau TJ, Layec G, Morgan DE, Bledsoe AD, Jessop JE, et al. Influence of  
793 group III/IV muscle afferents on small muscle mass exercise performance: a bioenergetics perspective.  
794 *The Journal of physiology*. 2018 2018;596(12):2301-14.
- 795 82. Sidhu SK, Weavil JC, Venturelli M, Garten RS, Rossman MJ, Richardson RS, et al. Spinal  $\mu$ -  
796 opioid receptor-sensitive lower limb muscle afferents determine corticospinal responsiveness and  
797 promote central fatigue in upper limb muscle. *The Journal of physiology*. 2014 2014;592(22):5011-24.
- 798 83. Staiano W, Bosio A, de Morree HM, Rampinini E, Marcora S. The cardinal exercise stopper:  
799 Muscle fatigue, muscle pain or perception of effort? *Progress in brain research: Elsevier*; 2018. p. 175-  
800 200.
- 801 84. Barbosa TC, Vianna LC, Fernandes IA, Prodel E, Rocha HNM, Garcia VP, et al. Intrathecal  
802 fentanyl abolishes the exaggerated blood pressure response to cycling in hypertensive men. *The Journal  
803 of physiology*. 2016 2016;594(3):715-25.
- 804 85. Sidhu SK, Weavil JC, Rossman MJ, Jessop JE, Bledsoe AD, Buys MJ, et al. Exercise pressor  
805 reflex contributes to the cardiovascular abnormalities characterizing: hypertensive humans during  
806 exercise. *Hypertension*. 2019 2019;74(6):1468-75.
- 807 86. Müller J. *Elements of physiology*. London, England: Lea and Blanchard; 1842.
- 808 87. Bain A. *The senses and the intellect*: Longman, Green, Longman, Roberts, and Green; 1864.
- 809 88. Bastian HC. *The brain as an organ of mind*: Appleton; 1880.
- 810 89. James W. *The feeling of effort*. *Anniversary Memoirs of the Boston Society of Natural History*.  
811 Boston, MA: The Society of Natural History; 1880. p. 3-32.
- 812 90. Craig AD. How do you feel? Interoception: the sense of the physiological condition of the body.  
813 *Nature reviews neuroscience*. 2002 2002;3(8):655-66.
- 814 91. Craig AD. Interoception: the sense of the physiological condition of the body. *Current opinion in  
815 neurobiology*. 2003 2003;13(4):500-5.
- 816 92. Pollak KA, Swenson JD, Vanhaisma TA, Hughen RW, Jo D, Light KC, et al. Exogenously  
817 applied muscle metabolites synergistically evoke sensations of muscle fatigue and pain in human  
818 subjects. *Experimental physiology*. 2014 2014;99(2):368-80.
- 819 93. Berchicci M, Menotti F, Macaluso A, Di Russo F. The neurophysiology of central and peripheral  
820 fatigue during sub-maximal lower limb isometric contractions. *Frontiers in human neuroscience*. 2013  
821 2013;7:135.
- 822 94. Guo F, Sun Y-J, Zhang R-H. Perceived exertion during muscle fatigue as reflected in movement-  
823 related cortical potentials: an event-related potential study. *Neuroreport*. 2017 2017;28(3):115-22.
- 824 95. Cerqueira V, De Mendonça A, Minez A, Dias AR, De Carvalho M. Does caffeine modify  
825 corticomotor excitability? *Neurophysiologie Clinique/Clinical Neurophysiology*. 2006 2006;36(4):219-  
826 26.
- 827 96. Kalmar JM. The influence of caffeine on voluntary muscle activation. *Medicine and science in  
828 sports and exercise*. 2005;37(12):2113-9.
- 829 97. Tarnopolsky MA. Effect of caffeine on the neuromuscular system—potential as an ergogenic aid.  
830 *Applied physiology, nutrition, and metabolism*. 2008;33(6):1284-9.

- 831 98. Zénon A, Sidibé M, Olivier E. Disrupting the supplementary motor area makes physical effort  
832 appear less effortful. *Journal of Neuroscience*. 2015;35(23):8737-44.
- 833 99. Nicolò A, Marcora SM, Sacchetti M. Respiratory frequency is strongly associated with perceived  
834 exertion during time trials of different duration. *Journal of sports sciences*. 2016;34(13):1199-206.
- 835 100. Friedman DB, Brennum J, Sztuk F, Hansen OB, Clifford PS, Bach FW, et al. The effect of  
836 epidural anaesthesia with 1% lidocaine on the pressor response to dynamic exercise in man. 1993  
837 1993;470(1):681-91.
- 838 101. Halperin I, Emanuel A. Rating of perceived effort: methodological concerns and future  
839 directions. *Sports Medicine*. 2020 2020;50(4):679-87.
- 840 102. Angius L, Pageaux B, Crisafulli A, Hopker J, Marcora SM. Ischemic preconditioning of the  
841 muscle reduces the metaboreflex response of the knee extensors. *European Journal of Applied*  
842 *Physiology*. 2021:1-15.
- 843 103. Pageaux B, Angius L, Hopker JG, Lepers R, Marcora SM. Central alterations of neuromuscular  
844 function and feedback from group III-IV muscle afferents following exhaustive high-intensity one-leg  
845 dynamic exercise. *American Journal of Physiology-Regulatory, Integrative and Comparative*  
846 *Physiology*. 2015;308(12):R1008-R20.
- 847 104. Marcora SM. Can doping be a good thing? Using psychoactive drugs to facilitate physical  
848 activity behaviour: Springer; 2016.
- 849
- 850

851

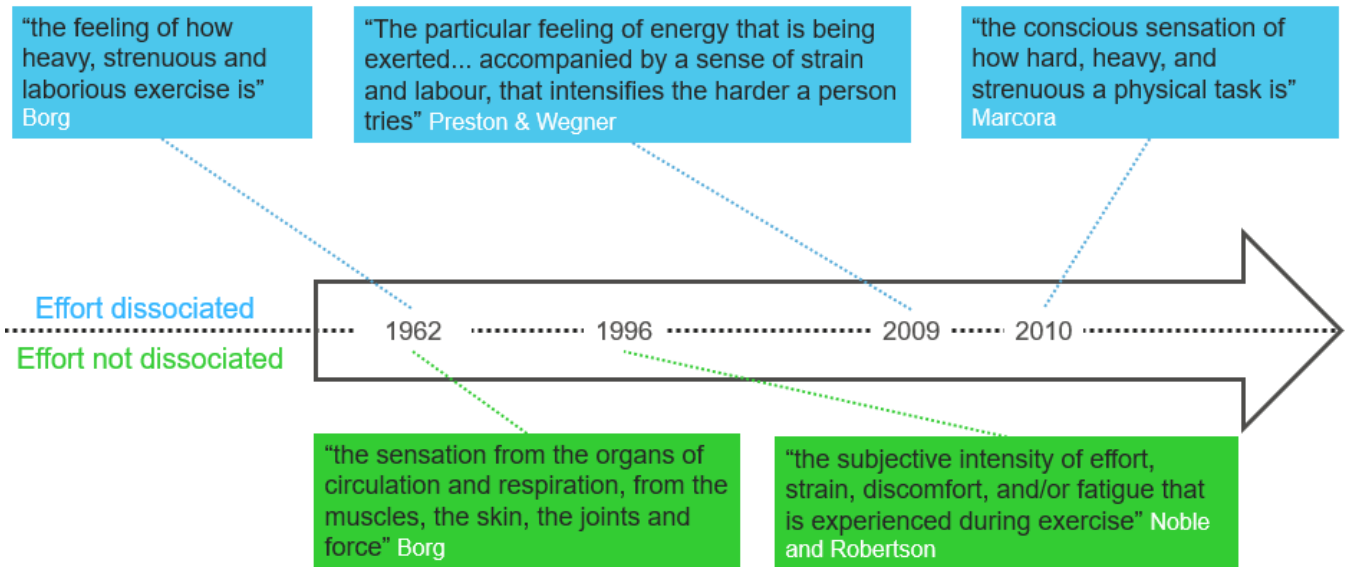

852

853 **Fig. 1:** Overview of the two lines of research investigating the perception of effort in exercise sciences  
854 and the primary definitions used in the literature. In blue, the perception of effort does not include other  
855 exercise-related perceptions and is investigated as a construct dissociated from other perceptions. This  
856 approach follows Borg’s original definition conceptualizing the perception of effort as one’s  
857 appreciation of the difficulty of a task (how *hard* it is). In green, the perception of effort includes other  
858 exercise-related perceptions and is investigated as a construct encompassing a mix of exercise-related  
859 perceptions. This approach results from the original description proposed by Borg.



860

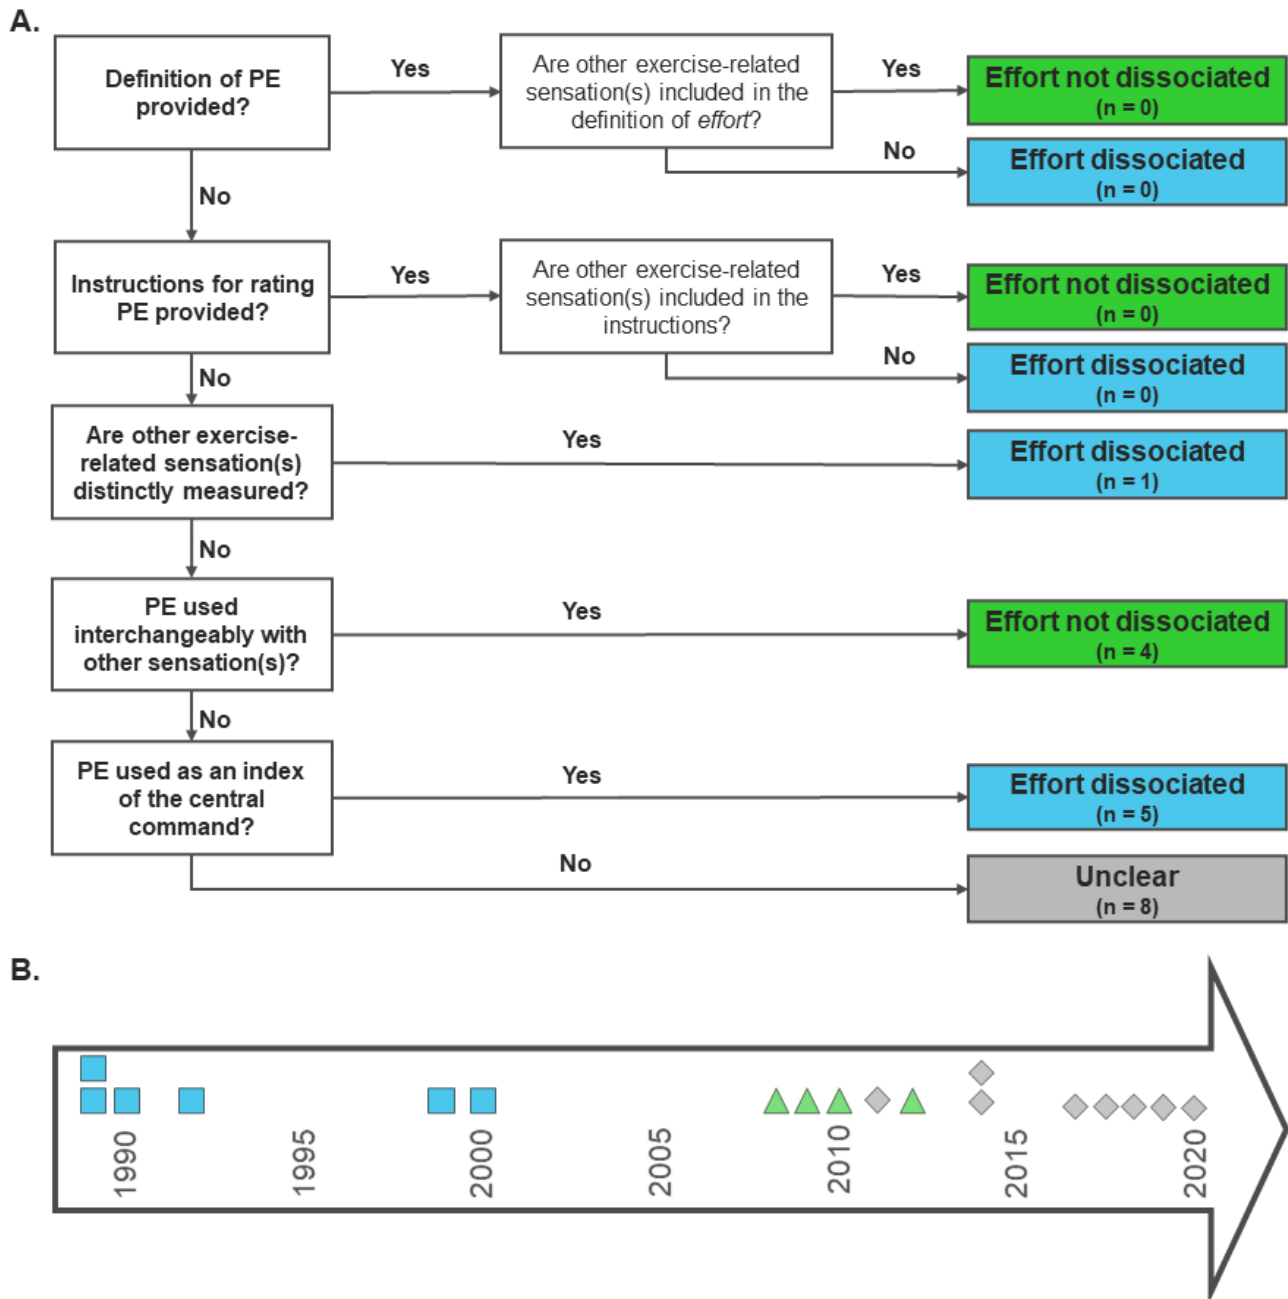

861

862 **Figure 2:** Panel A illustrates the coding process used for the classification of the articles included in the  
863 systematic review. Panel B illustrates the changes overtime in the use of the perception of effort  
864 construct in the included studies.

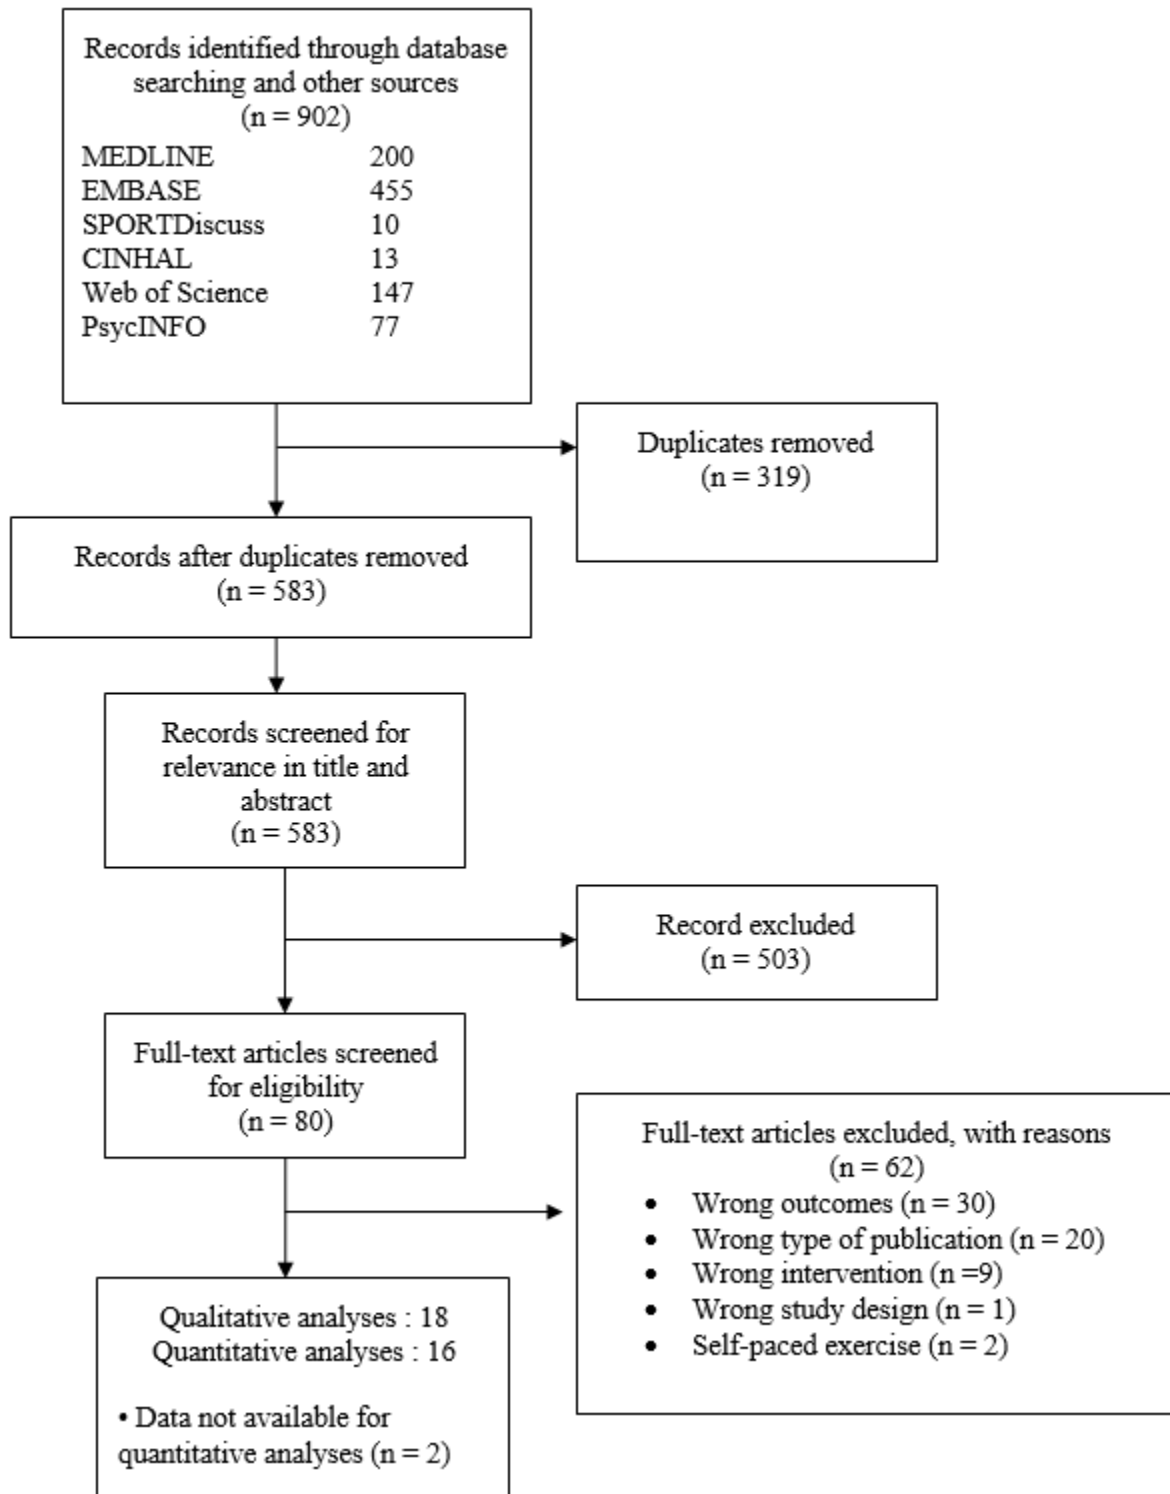

865

866 **Figure 3:** Flow diagram of systematic review inclusion/exclusion adapted from the Preferred Reporting  
867 Items for Systematic Reviews and Meta-Analyses.

868

869

870

### Funnel plot of all studies (combined \*effort\*, \*gestalt\*, and \*unclear\* RPE scores)

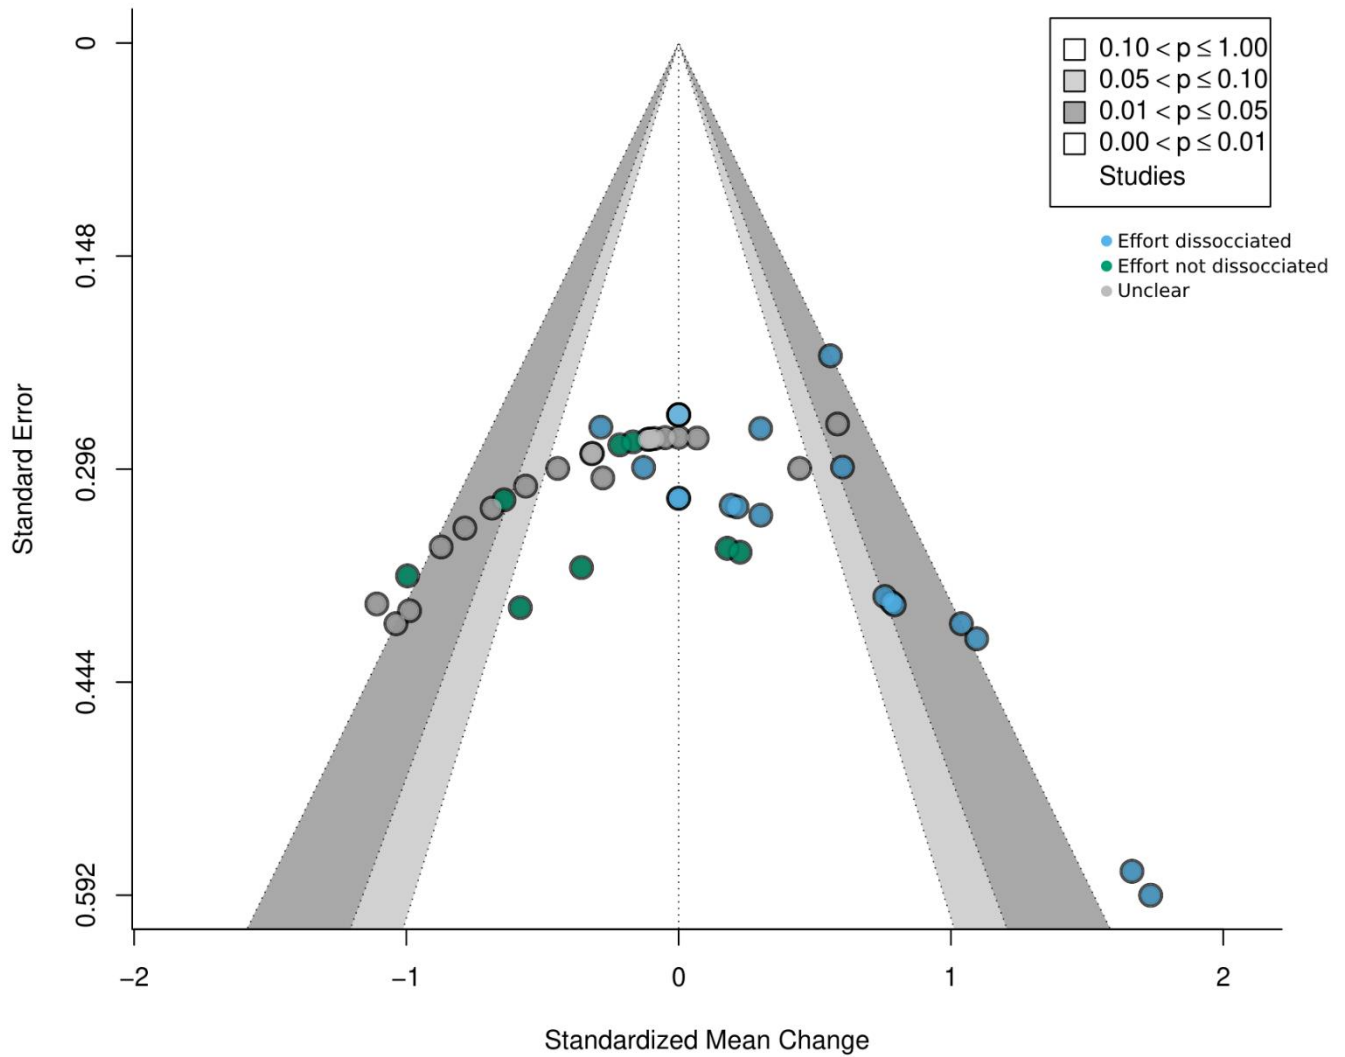

871

872

873

**Figure 4:** Contour enhanced funnel plot for all effects (*i.e.*, rating of perception of effort as *effort dissociated*, *effort not-dissociated*, *unclear* color coded; see legend).

874

### A. Submaximal Exercise Tasks - *effort dissociated* group

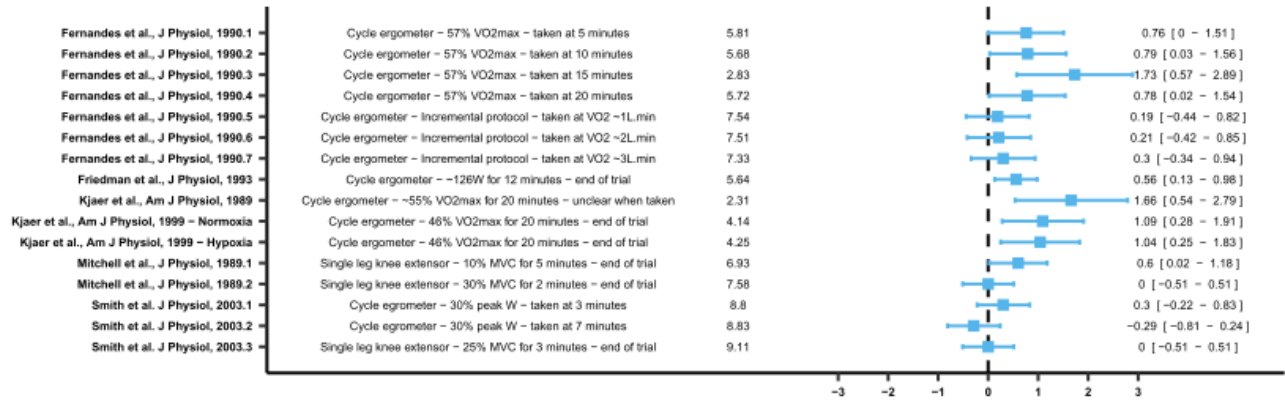

### B. Submaximal Exercise Tasks - *effort not dissociated* group

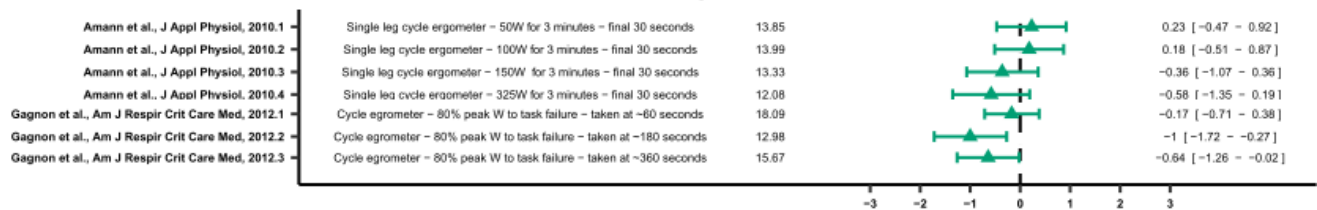

### C. Submaximal Exercise Tasks - *unclear* group

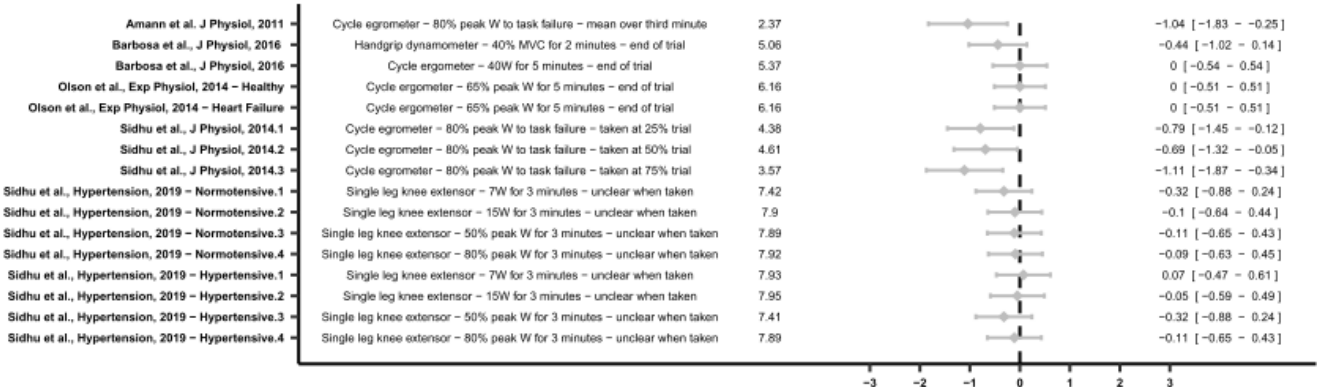

### D. Submaximal Exercise Tasks - Overall model estimates for all codings, and combined

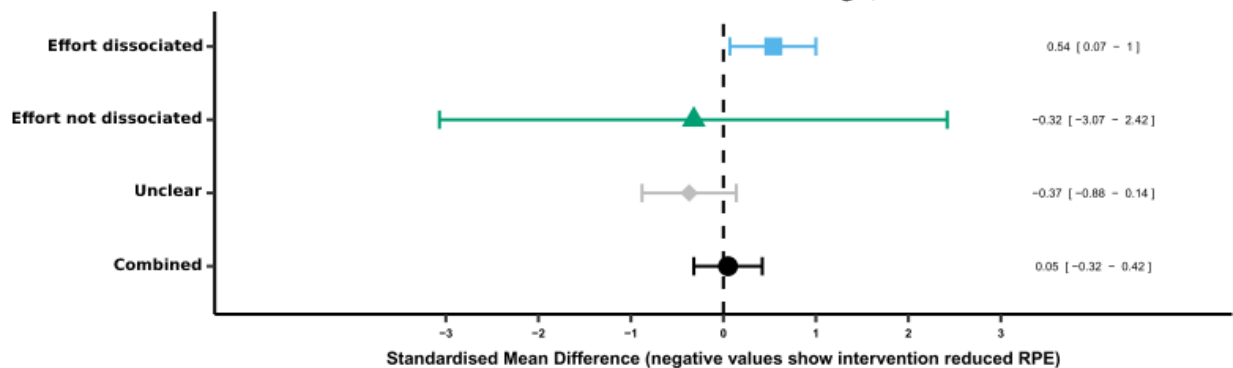

**Figure 5:** Forest plot for the effect of an epidural anesthesia on the perception of at submaximal exercise demands (comparison epidural vs. placebo or no intervention). Panel A illustrates the effect sizes for the *effort dissociated* group. Panel B illustrates the effect sizes for the *effort not dissociated* group. Panel C illustrates effect sizes for the *unclear* group. Panel D illustrates the overall effect sizes for all coding and combined. Standardized mean different with 95% confidence intervals are shown.

### A. Maximal Exercise Tasks - *effort dissociated* group

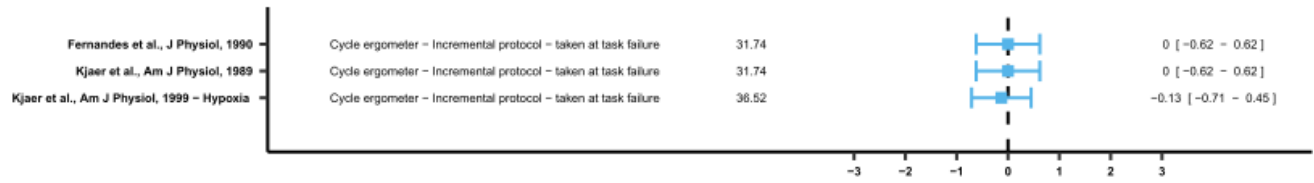

### B. Maximal Exercise Tasks - *effort not dissociated* group

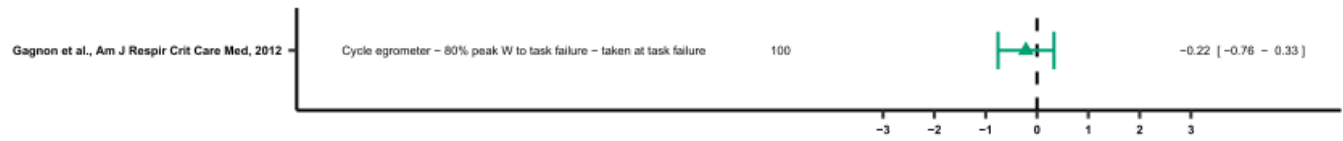

### C. Maximal Exercise Tasks - *unclear* group

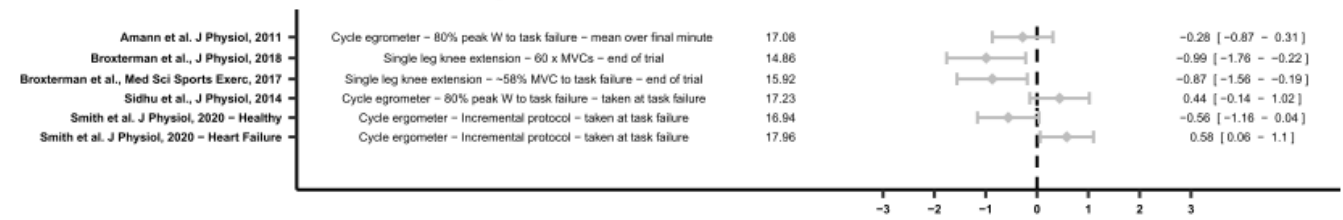

### D. Maximal Exercise Tasks - Overall model estimates for all codings, and combined

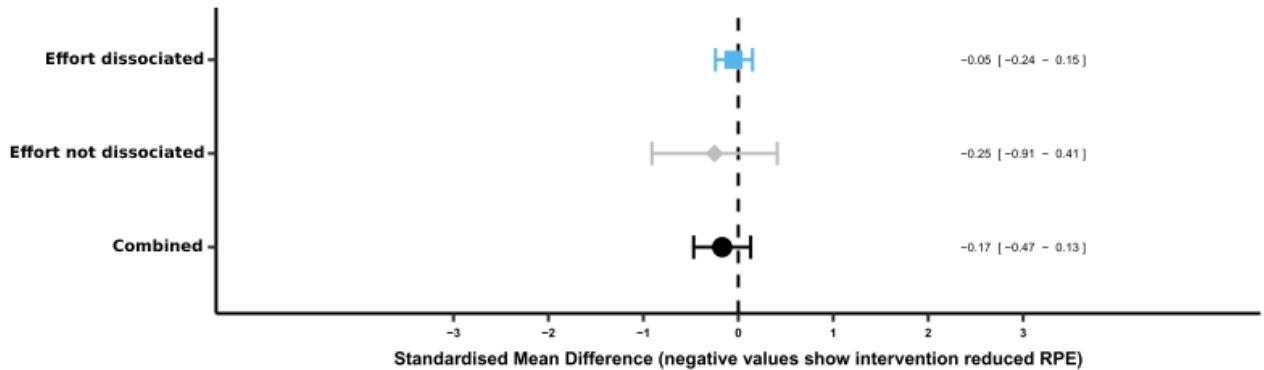

**Figure 6:** Forest plot for the effect of an epidural anesthesia on the perception of effort at maximal demands (comparison epidural vs. placebo or no intervention). Panel A illustrates the effect sizes for the *effort dissociated* group. Panel B illustrates the effect sizes for the *effort not dissociated* group. Panel C illustrates effect sizes for the *unclear* group. Panel D illustrates the overall effect sizes for all coding and combined. Standardized mean different with 95% confidence intervals are shown.

Table 1. Risks of bias within included studies

|                                | <b>Design</b> | <b>Confounders</b> | <b>Blinding</b> |          | <b>Data collection methods</b> |       |          | <b>Intervention integrity</b> |             | <b>Overall label</b> |       |
|--------------------------------|---------------|--------------------|-----------------|----------|--------------------------------|-------|----------|-------------------------------|-------------|----------------------|-------|
|                                | Label         | Label              | Assessor        | Subjects | Label                          | Valid | Reliable | Label                         | Consistency | Contamination        | Label |
| <i>Ammann et al., 2010</i>     | S             | S                  | ?               | Y        | M                              | ?     | ?        | W                             | Y           | Y                    | M     |
| <i>Amann et al., 2011</i>      | S             | S                  | ?               | Y        | M                              | ?     | ?        | W                             | Y           | Y                    | M     |
| <i>Amann et al., 2014</i>      | M             | M                  | N               | N        | W                              | ?     | ?        | W                             | Y           | Y                    | W     |
| <i>Barbosa et al., 2014</i>    | M             | S                  | N               | N        | W                              | ?     | ?        | W                             | N           | Y                    | W     |
| <i>Blain et al., 2016</i>      | S             | S                  | N               | N        | W                              | ?     | ?        | W                             | N           | Y                    | W     |
| <i>Broxterman et al., 2017</i> | S             | S                  | N               | N        | W                              | ?     | ?        | W                             | N           | Y                    | W     |
| <i>Broxterman et al., 2018</i> | S             | S                  | N               | N        | W                              | ?     | ?        | W                             | N           | Y                    | W     |
| <i>Fernandes et al., 1990</i>  | S             | W                  | N               | N        | W                              | Y     | Y        | S                             | Y           | Y                    | W     |
| <i>Friedman et al., 1993</i>   | M             | W                  | N               | N        | W                              | Y     | Y        | S                             | Y           | Y                    | W     |
| <i>Gagnon et al., 2012</i>     | S             | M                  | Y               | Y        | S                              | N     | N        | W                             | N           | Y                    | M     |
| <i>Kjaer et al., 1989</i>      | S             | M                  | N               | N        | W                              | Y     | Y        | S                             | Y           | Y                    | M     |
| <i>Kjaer et al., 1999</i>      | M             | M                  | N               | N        | W                              | Y     | Y        | S                             | Y           | Y                    | W     |
| <i>Mitchell et al., 1989</i>   | M             | W                  | N               | N        | W                              | Y     | Y        | S                             | Y           | Y                    | W     |
| <i>Olson et al., 2014</i>      | S             | S                  | ?               | Y        | M                              | N     | N        | W                             | Y           | Y                    | M     |
| <i>Sidhu et al., 2014</i>      | M             | W                  | N               | N        | W                              | N     | N        | W                             | N           | Y                    | W     |
| <i>Sidhu et al., 2019</i>      | S             | M                  | N               | N        | W                              | ?     | ?        | W                             | N           | Y                    | W     |
| <i>Smith et al., 2003</i>      | M             | M                  | N               | N        | W                              | Y     | Y        | S                             | Y           | Y                    | W     |
| <i>Smith et al., 2020</i>      | S             | W                  | N               | Y        | M                              | ?     | ?        | W                             | Y           | Y                    | W     |

W: weak; M: moderate; S: strong; N: no; Y: yes; ?: unclear

"the feeling of how heavy, strenuous and laborious exercise is"  
Borg

"The particular feeling of energy that is being exerted... accompanied by a sense of strain and labour, that intensifies the harder a person tries" Preston & Wegner

"the conscious sensation of how hard, heavy, and strenuous a physical task is"  
Marcora

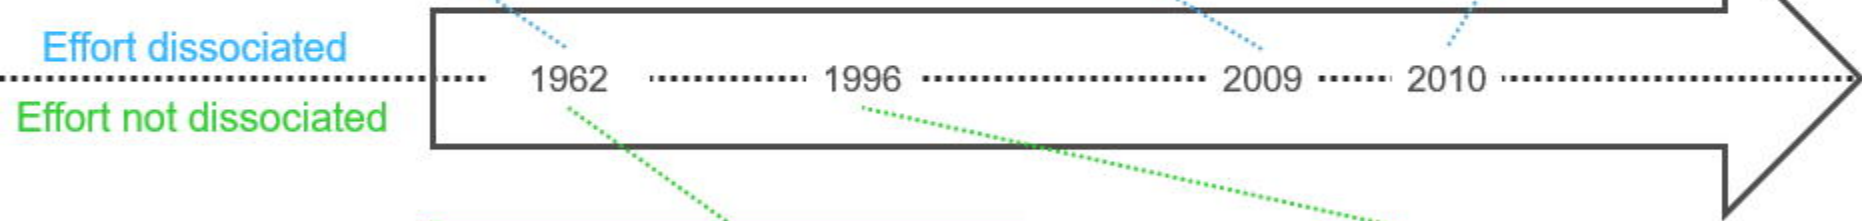

"the sensation from the organs of circulation and respiration, from the muscles, the skin, the joints and force" Borg

"the subjective intensity of effort, strain, discomfort, and/or fatigue that is experienced during exercise" Noble and Robertson



A.

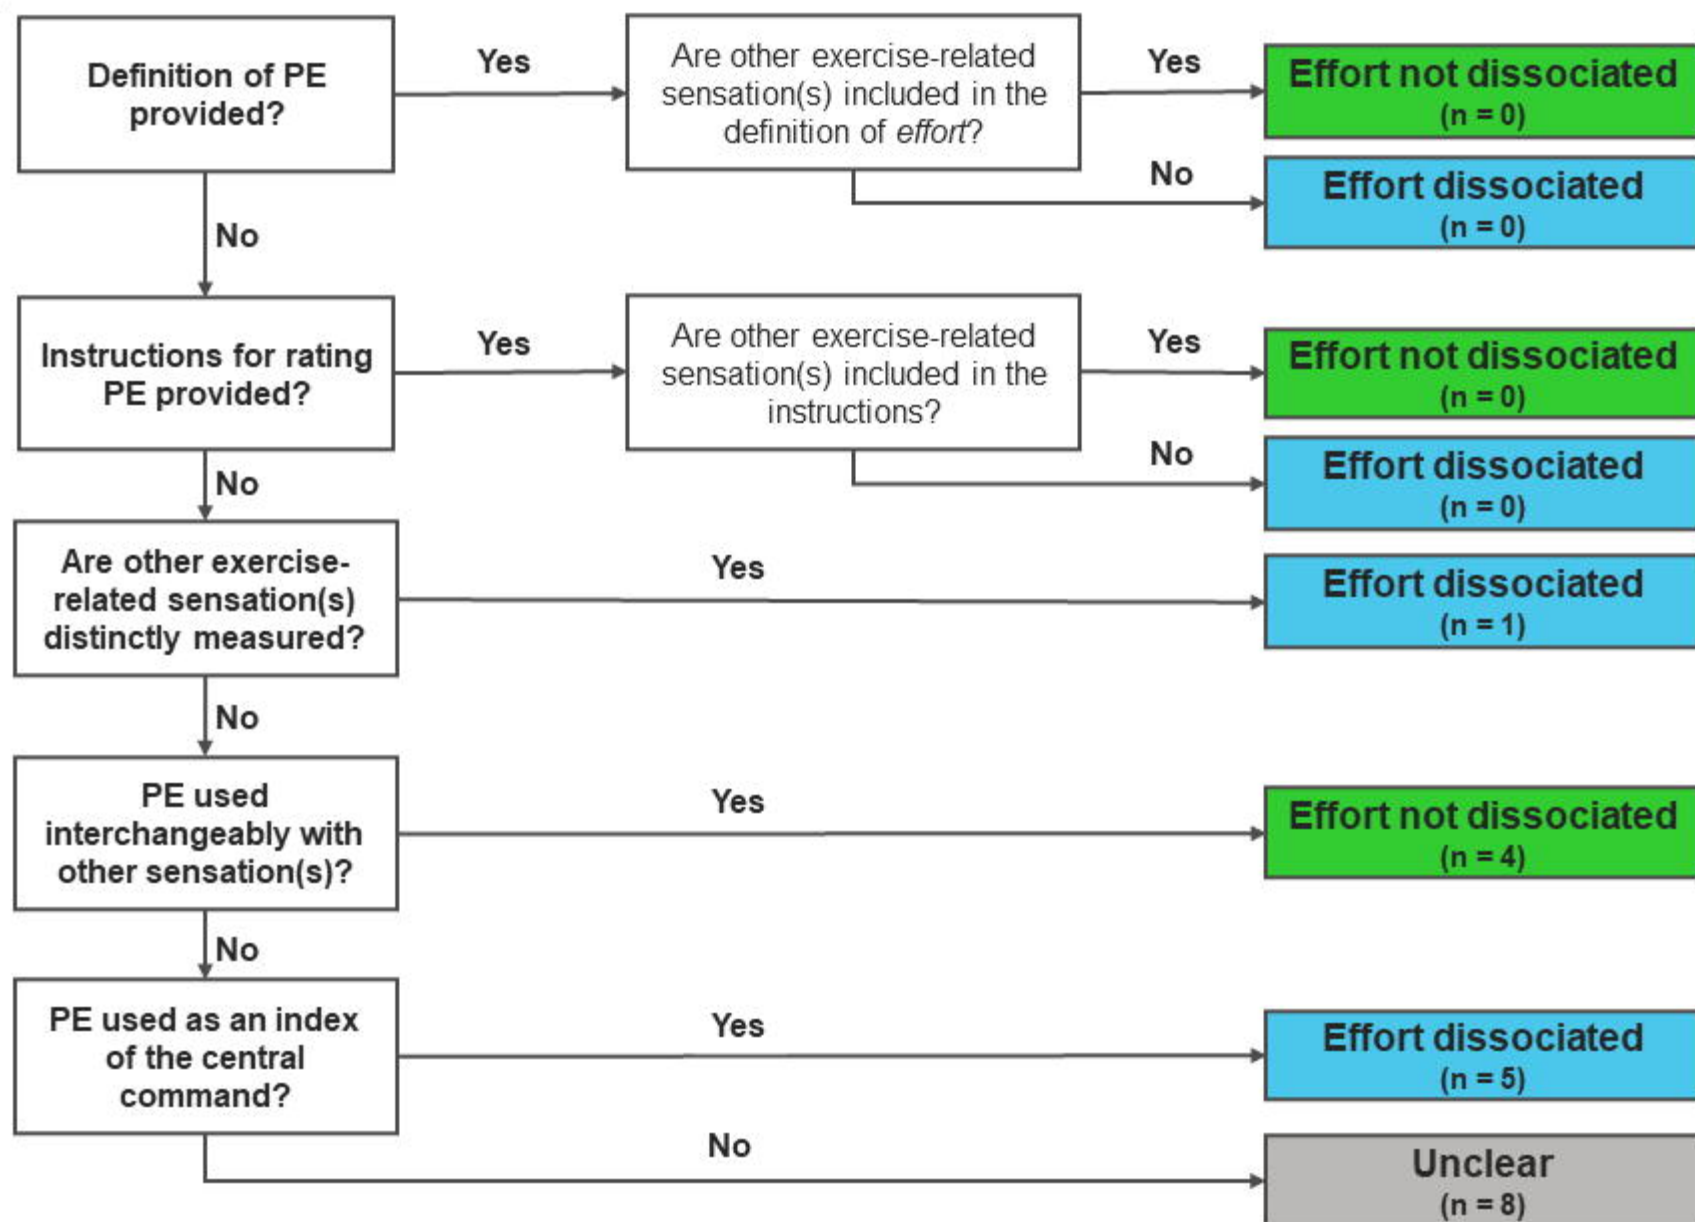

B.

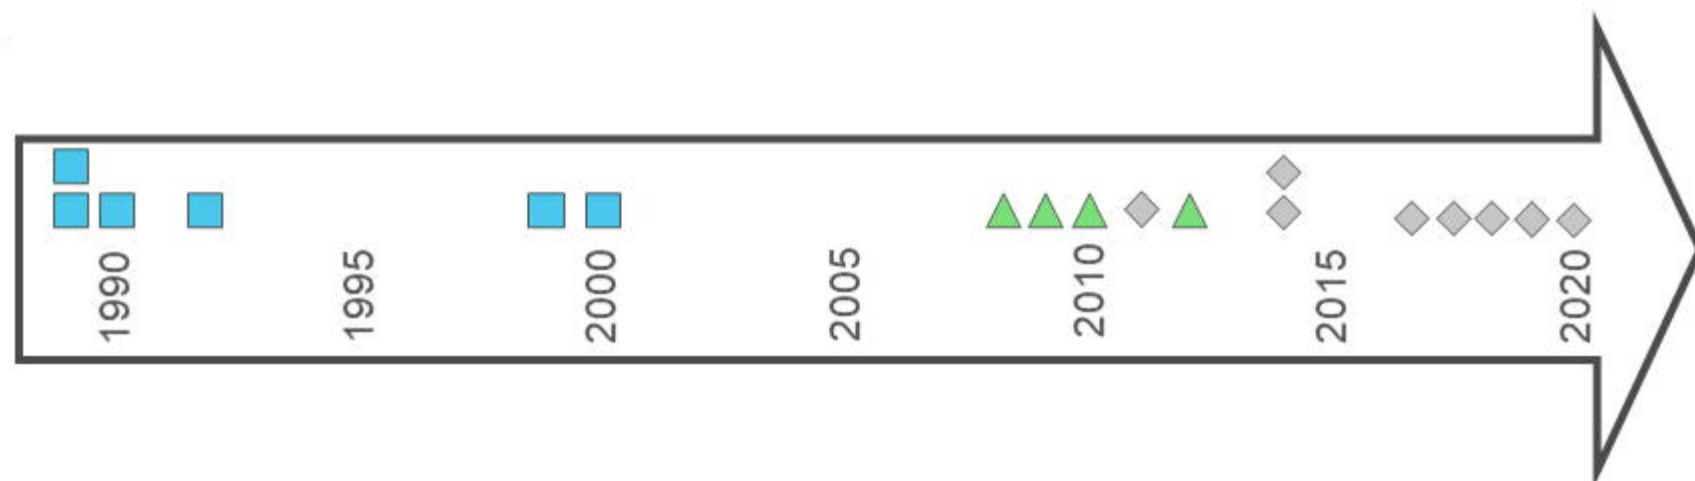

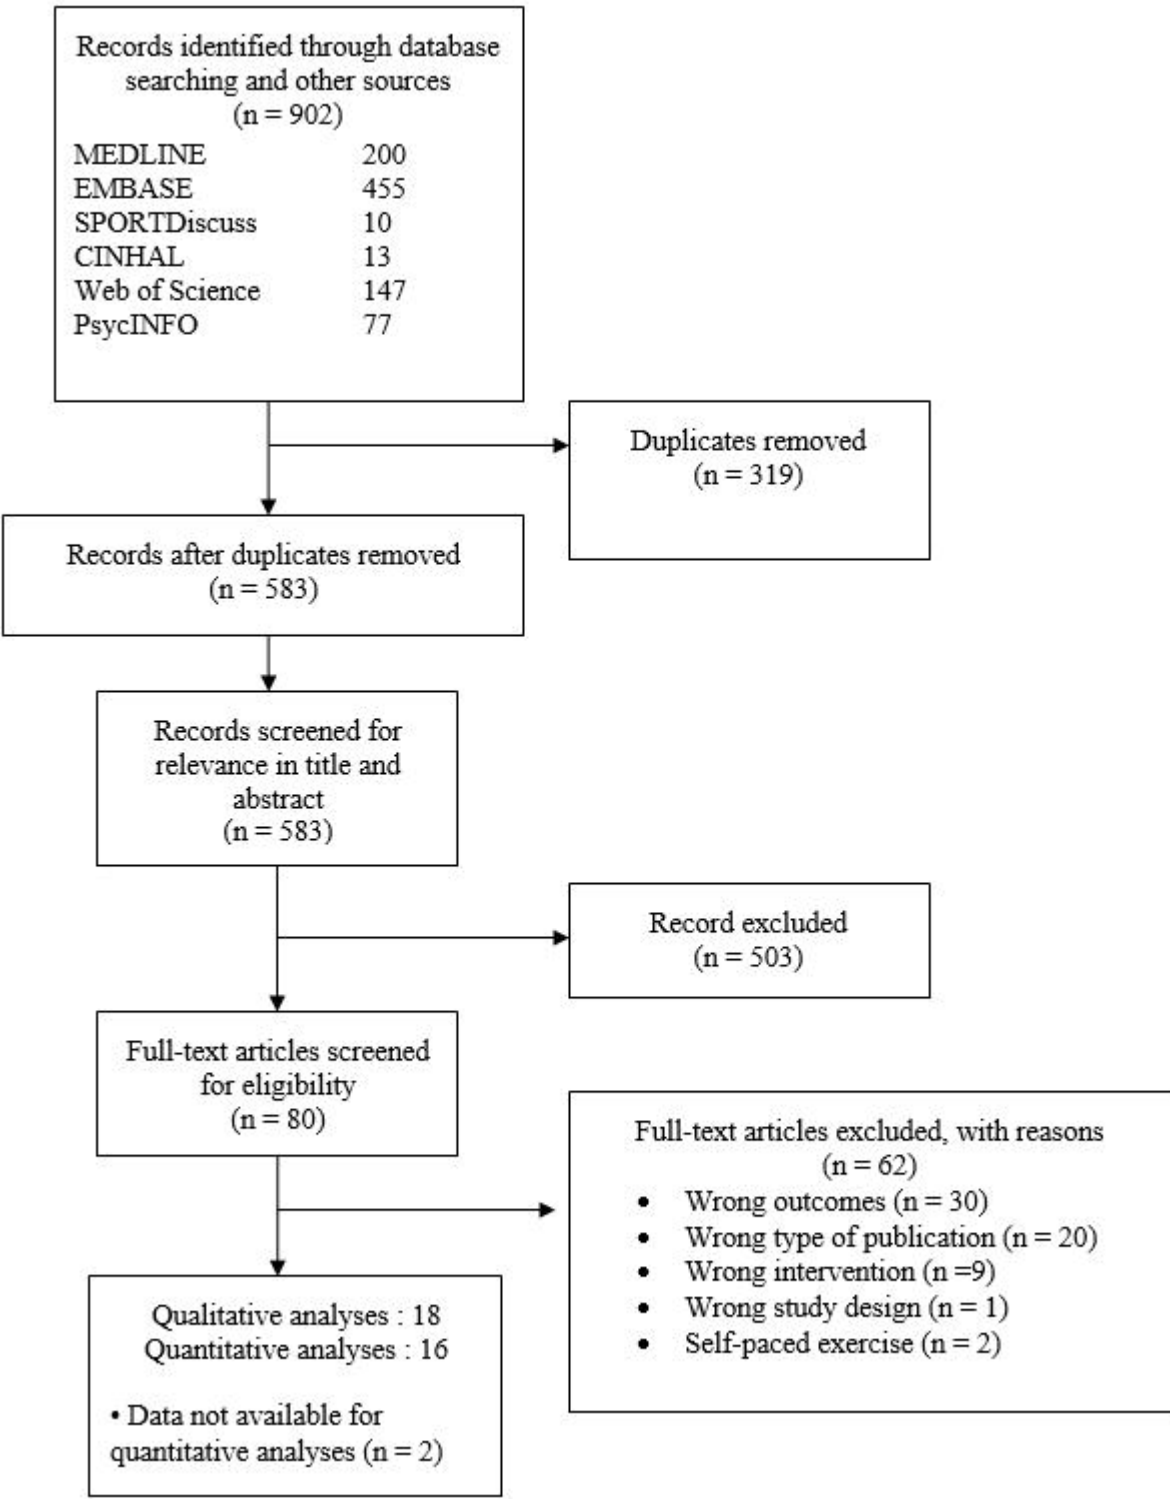

# Funnel plot of all studies (combined \*effort\*, \*gestalt\*, and \*unclear\* RPE scores)

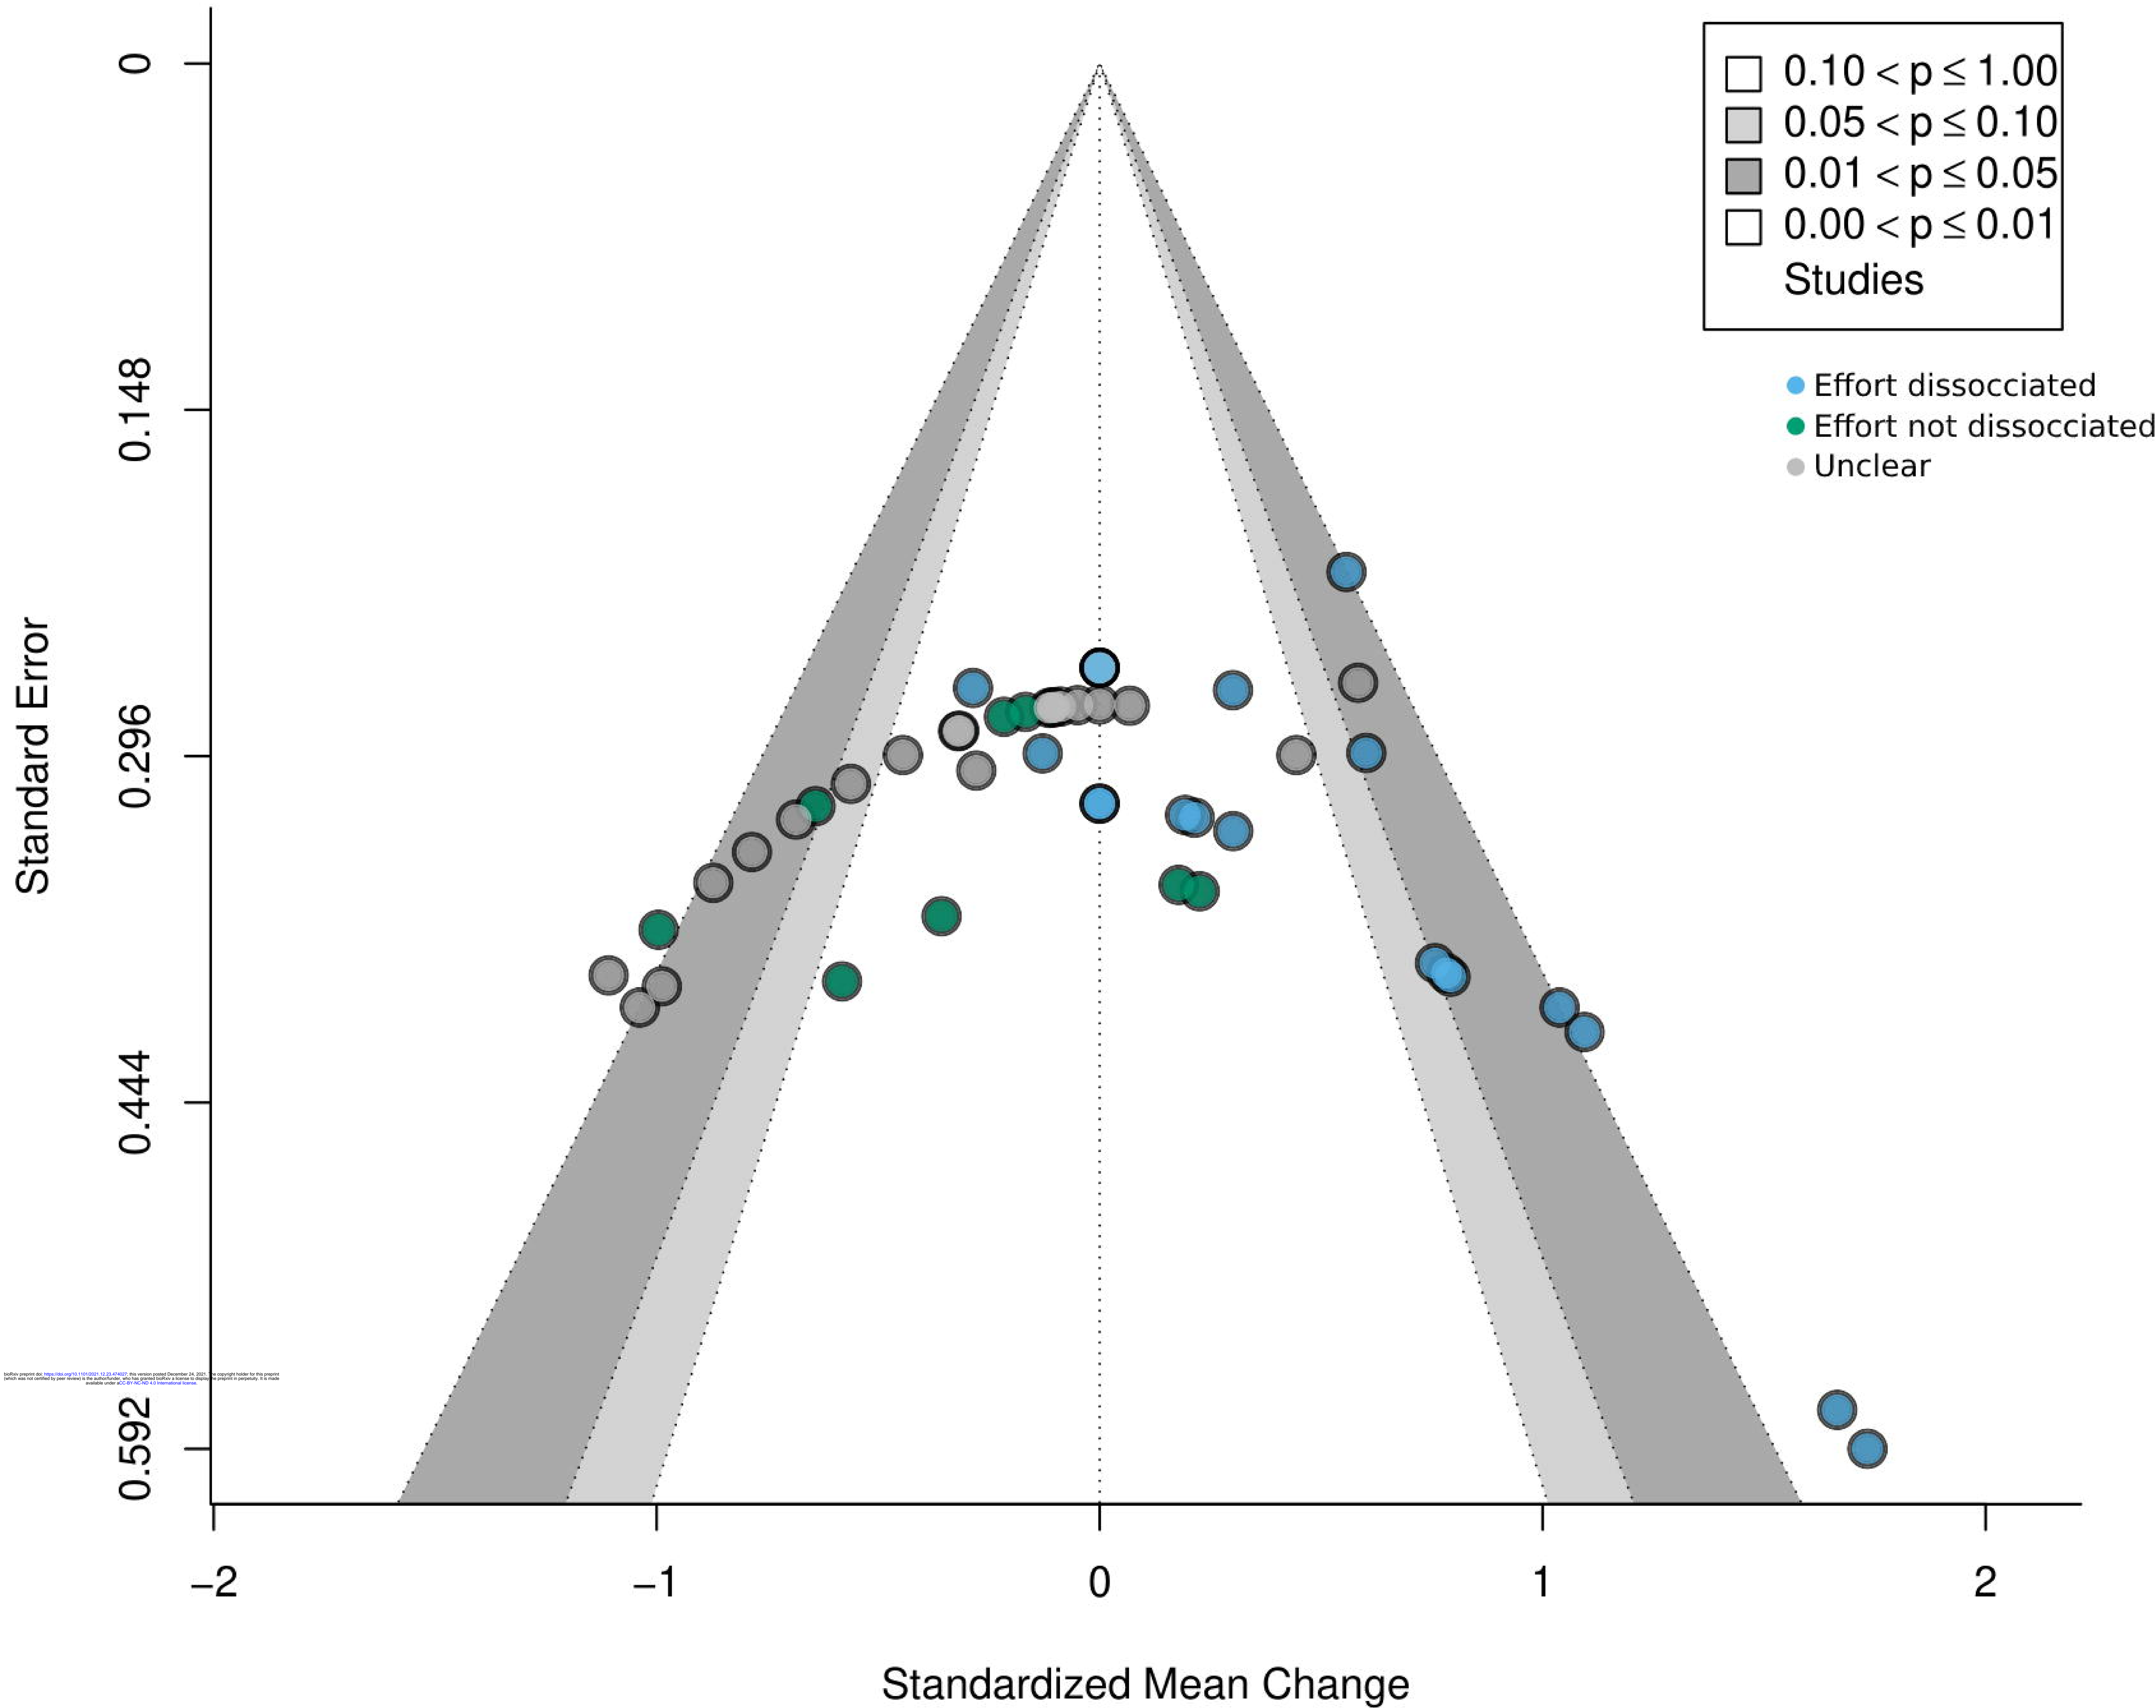



## A. Submaximal Exercise Tasks - *effort dissociated* group

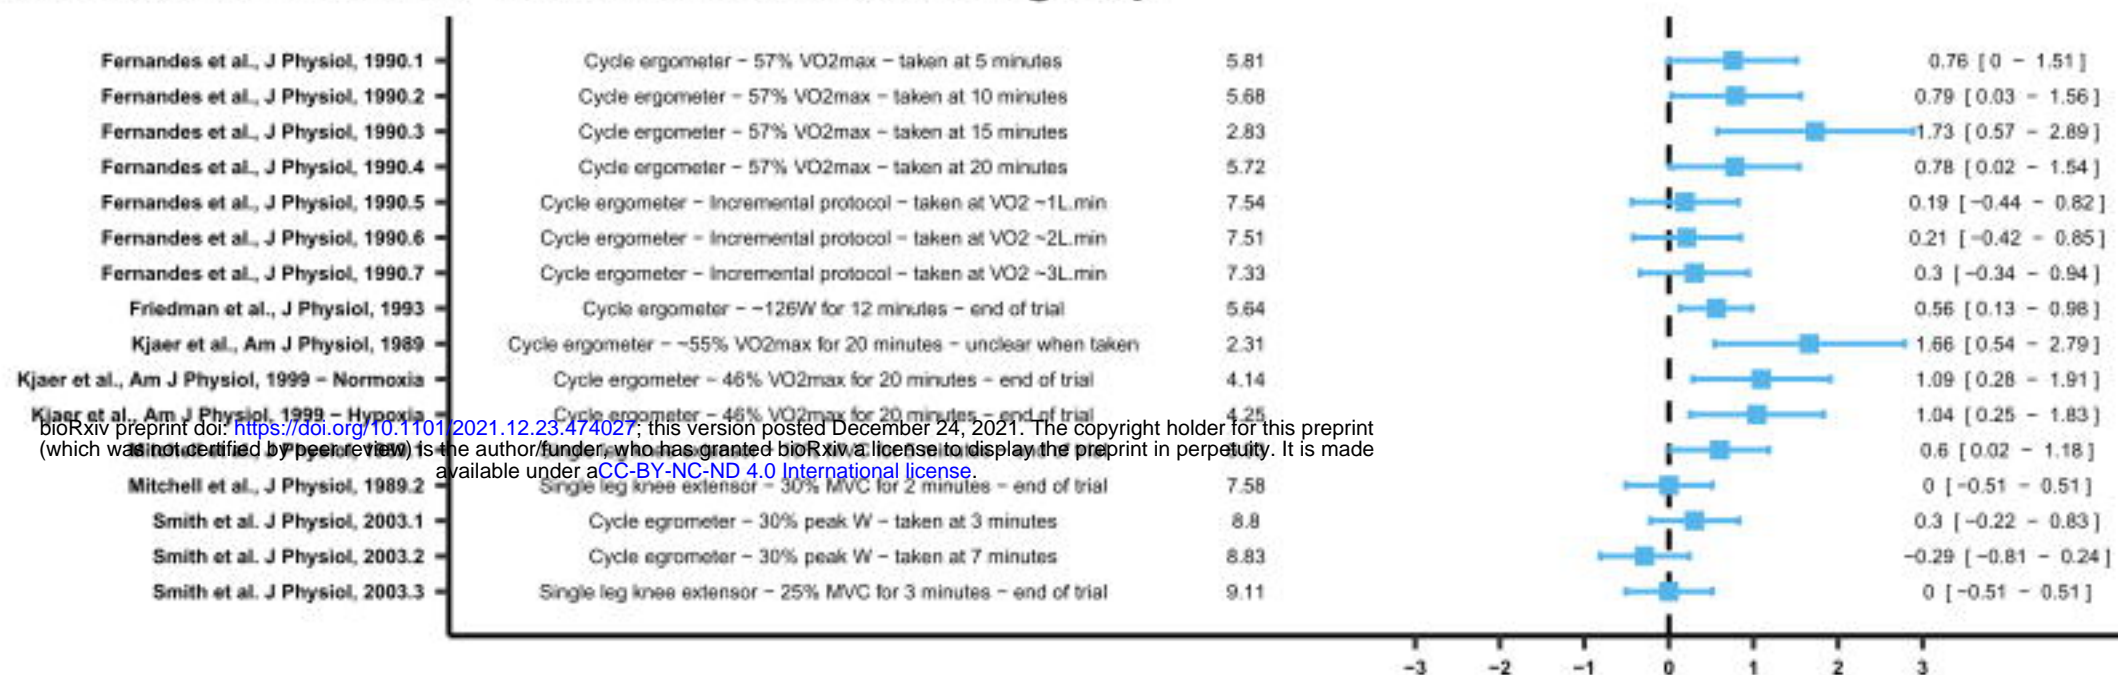

## B. Submaximal Exercise Tasks - *effort not dissociated* group

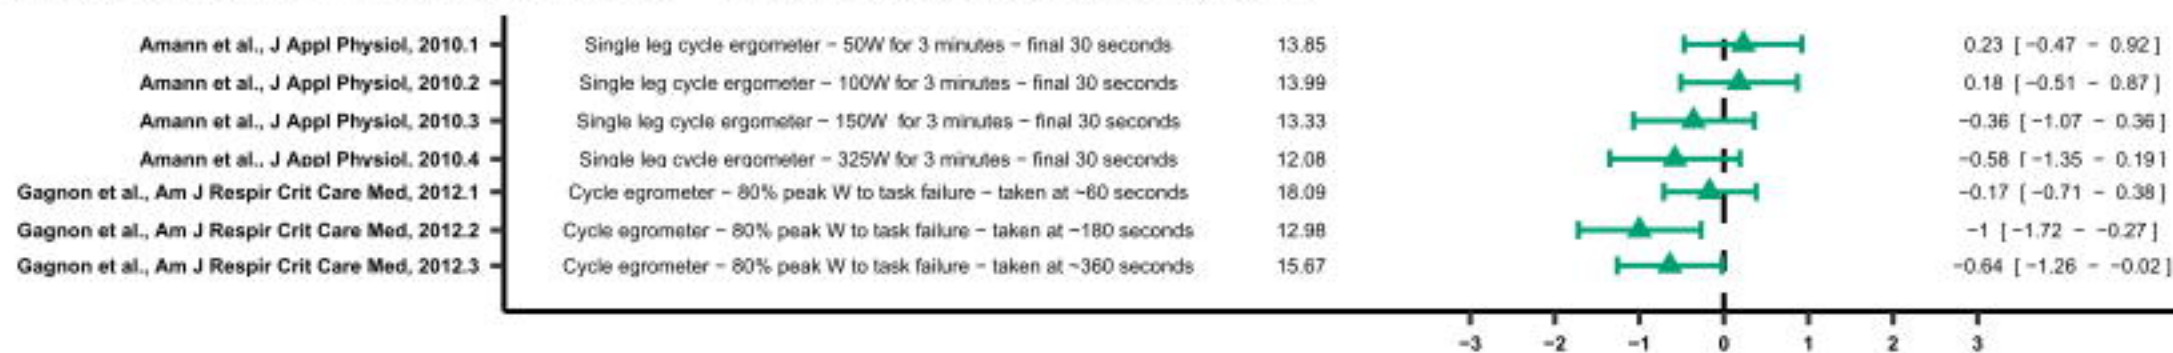

## C. Submaximal Exercise Tasks - *unclear* group

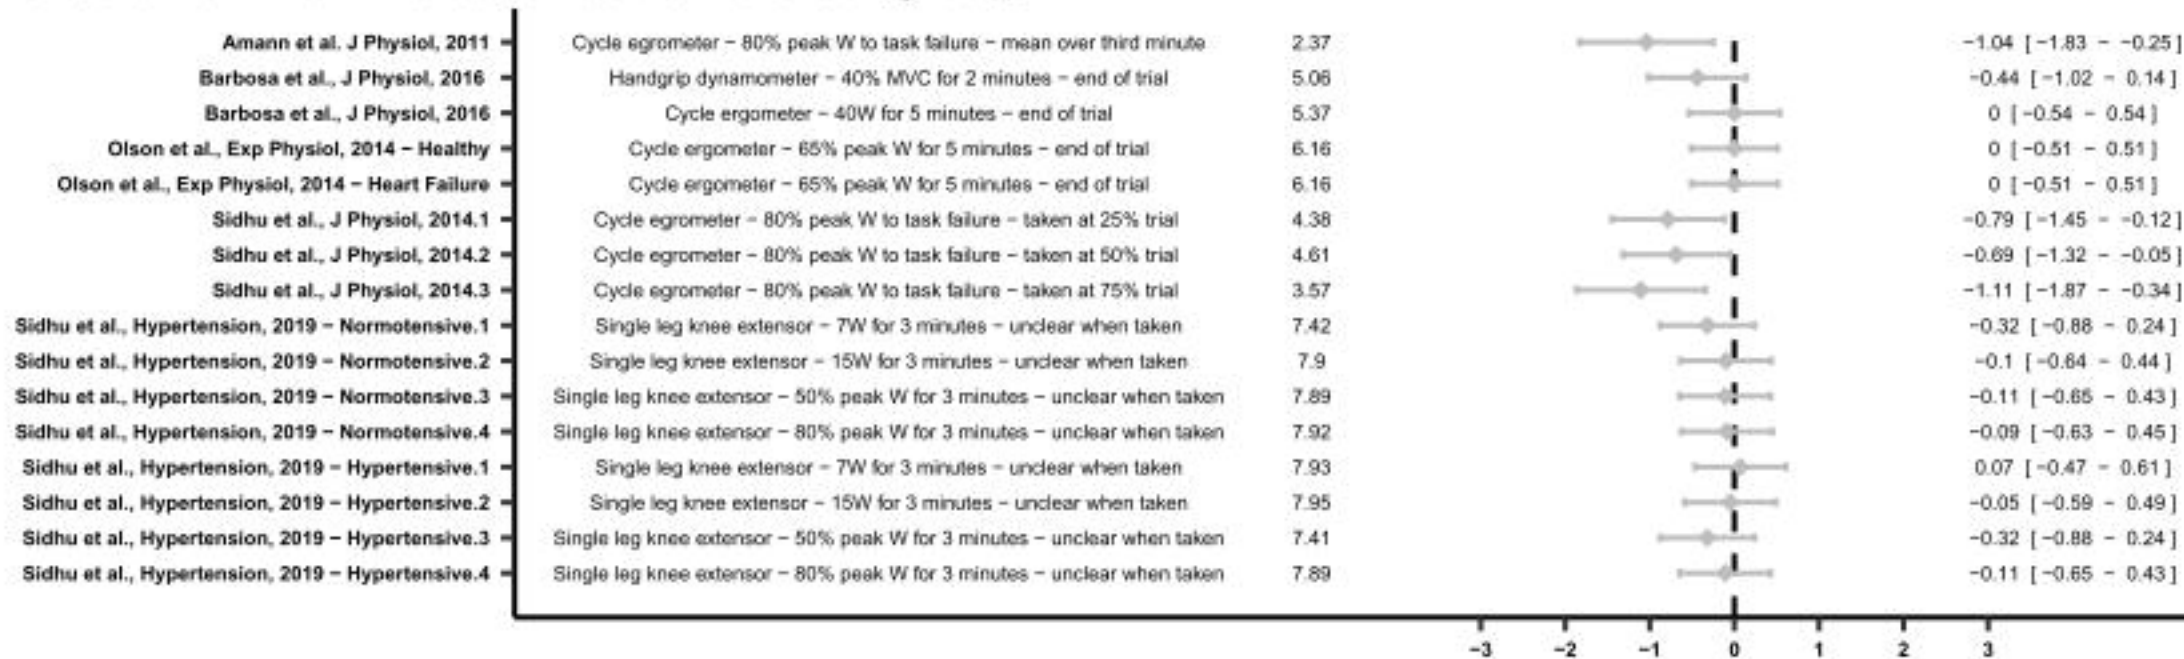

## D. Submaximal Exercise Tasks - Overall model estimates for all codings, and combined

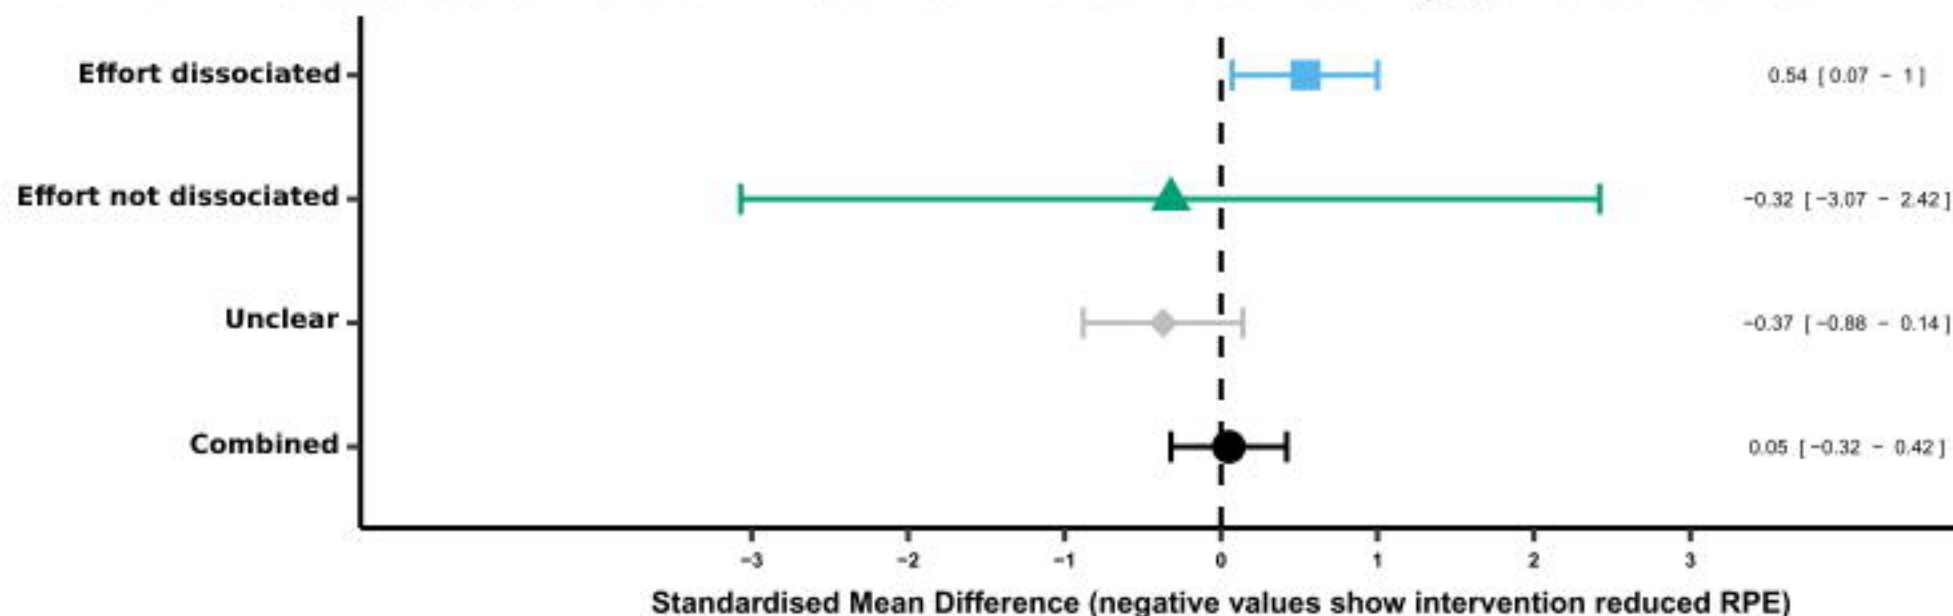

### A. Maximal Exercise Tasks - *effort dissociated* group

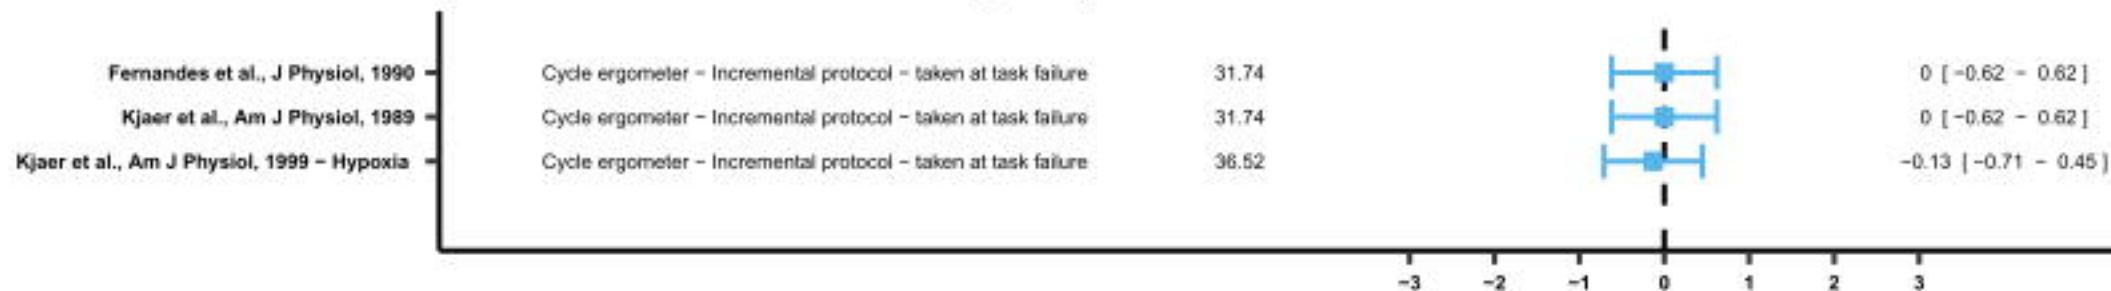

### B. Maximal Exercise Tasks - *effort not dissociated* group

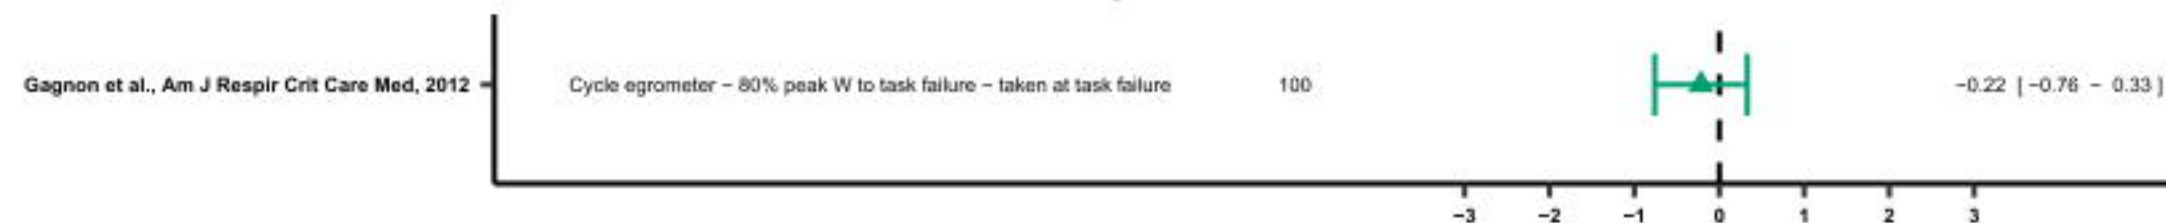

### C. Maximal Exercise Tasks - *unclear* group

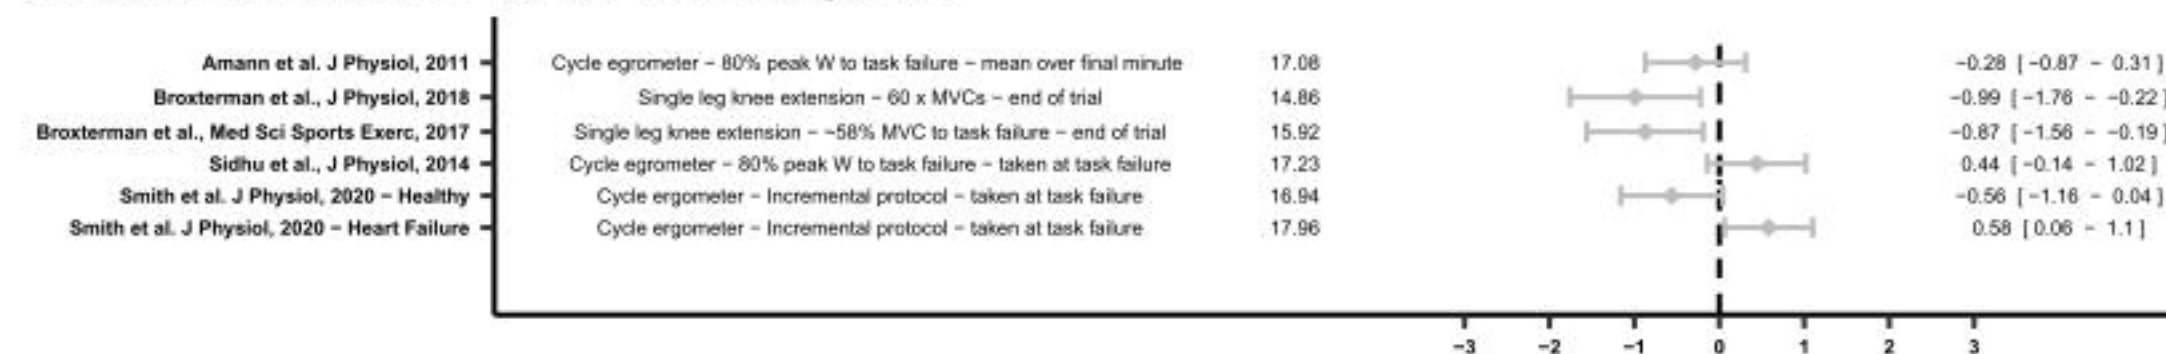

### D. Maximal Exercise Tasks - Overall model estimates for all codings, and combined

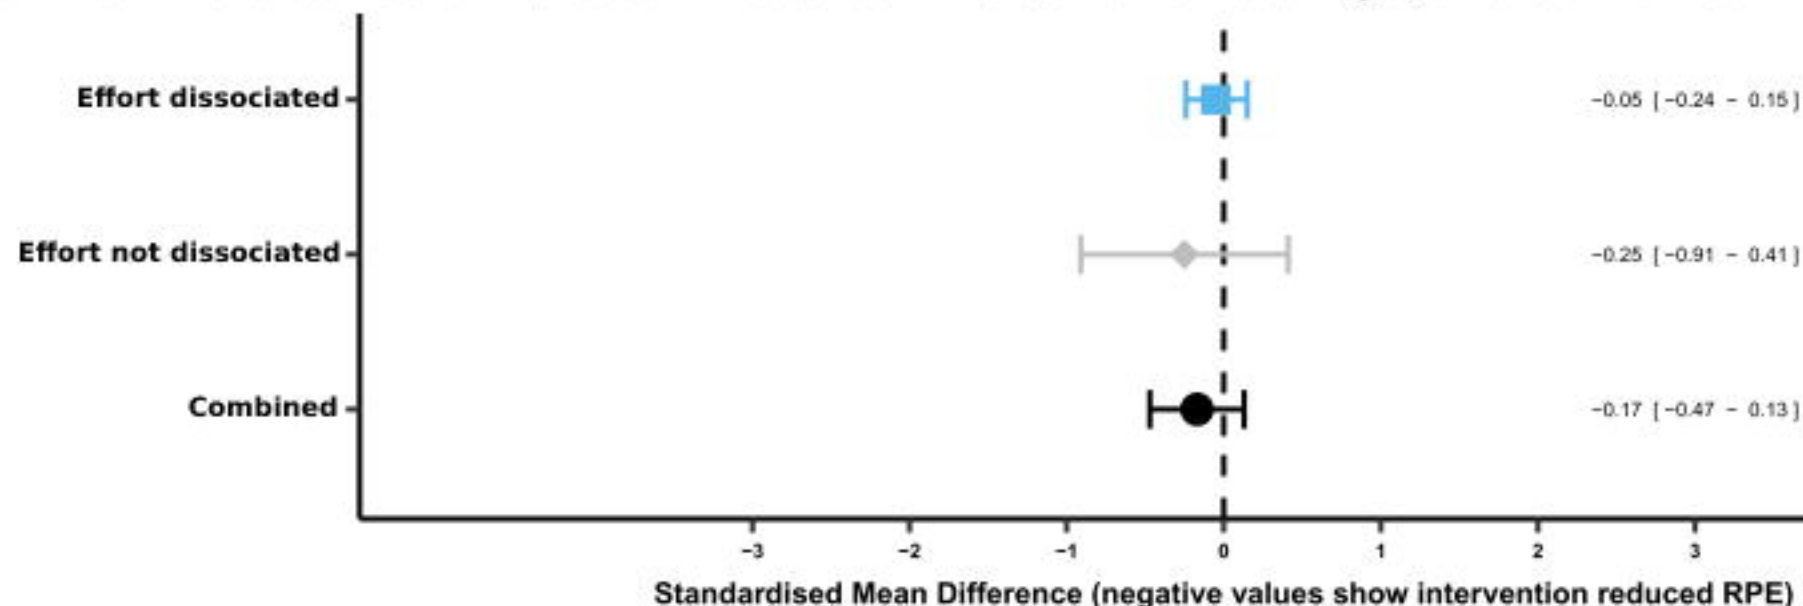

Source: http://biorxiv.org/content/10.1101/2021.12.23.474027v1.full.pdf
